# Supplementary material
Source: publisher figshare collection journal article supplement (https://acs.figshare.com/ndownloader/files/5797578)

#### Terms & Conditions

Electronic Supporting Information files are available without a subscription to ACS Web Editions. The American Chemical Society holds a copyright ownership interest in any copyrightable Supporting Information. Files available from the ACS website may be downloaded for personal use only. Users are not otherwise permitted to reproduce, republish, redistribute, or sell any Supporting Information from the ACS website, either in whole or in part, in either machine-readable form or any other form without permission from the American Chemical Society. For permission to reproduce, republish and redistribute this material, requesters must process their own requests via the RightsLink permission system. Information about how to use the RightsLink permission system can be found at <http://pubs.acs.org/page/copyright/permissions.html>

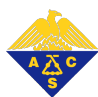

ACS Publications

MOST TRUSTED. MOST CITED. MOST READ.

Copyright © 1997 American Chemical Society

Supporting Information for  
*Stereoselective Synthesis of the C3-C17  
 Bis-Oxane Domain of Phorboxazole A*

## Experimental Procedures and Compound Characterization Data

**General Methods.** All reactions were carried out under argon or nitrogen in oven dried glassware using standard syringe, cannula, and septa techniques. Tetrahydrofuran and Et<sub>2</sub>O were distilled from Na/benzophenone ketyl under nitrogen. CH<sub>2</sub>Cl<sub>2</sub>, CH<sub>3</sub>CN, Et<sub>3</sub>N, and BF<sub>3</sub>•OEt<sub>2</sub> were distilled from CaH<sub>2</sub> under nitrogen. DMF was dried over activated 3Å molecular sieves. (*S*)-4-(4-Methoxybenzyloxy)butan-1,2-diol was prepared from (*S*)-malic acid as previously described for (*S*)-4-(benzyloxy)butan-1,2-diol. Flash chromatography was performed using Baker Flash silica gel 60 (40 μm) and the solvent systems indicated. Analytical and preparative TLC was performed with 0.25 mm or 0.50 mm EM silica gel 60 F<sub>254</sub> plates, respectively, and visualized by fluorescence upon 254 nm irradiation and/or staining with anisaldehyde reagent (450 mL of 95% EtOH, 25 mL of H<sub>2</sub>SO<sub>4</sub>, 15 mL of HOAc, and 25 mL of anisaldehyde). NMR spectra obtained in CDCl<sub>3</sub> are referenced to residual CHCl<sub>3</sub> at 7.25 ppm (<sup>1</sup>H) and 77.0 ppm (<sup>13</sup>C). The mass spectrometers used show deviations of less than 5 ppm.

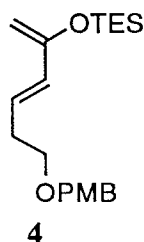

### Preparation of Diene 4.

#### 3-(4-Methoxybenzyloxy)-propan-1-ol (4a).

To a soln of *p*-anisaldehyde (27.5 g, 202 mmol) in benzene (700 mL) was added 1,3-propanediol (15.22 g, 200.0 mmol), and TsOH•H<sub>2</sub>O (90 mg, 500 μmol). The flask was equipped with a Dean-Stark trap and the mixture heated at reflux for 18 h. The mixture was cooled to rt, concentrated by rotary evaporation to a volume of 200 mL, and diluted with THF (300 mL). The soln was cooled to 0 °C and LiAlH<sub>4</sub> (7.6 g, 0.20 mol) followed by AlCl<sub>3</sub> (27 g, 0.20 mol) were added cautiously. The mixture was warmed to rt and stirred for 18 h. The reaction was quenched cautiously with water (150 mL) and 15% aqueous NaOH (150 mL). The mixture was extracted with Et<sub>2</sub>O (3 X 200 mL) and the combined organic phases were dried over MgSO<sub>4</sub>, filtered through a plug of silica gel and concentrated by rotary evaporation. The resultant pale yellow oil was distilled (bp 149-154 °C, 0.9 Torr) to give 3-(4-methoxybenzyloxy)-propan-1-ol (33.44 g, 170.4 mmol, 85%) as a colorless oil: <sup>1</sup>H NMR (CDCl<sub>3</sub>, 300 MHz): δ 7.24 (d, *J* = 8.6 Hz, 2H), 6.87 (d, *J* = 8.6 Hz, 2H), 4.44 (s, 2H), 3.80 (s, 3H), 3.77 (q, *J* = 5.7 Hz, 2H), 3.63 (t, *J* = 5.7 Hz, 2H), 2.27 (t, *J* = 5.7 Hz, 1H), 1.84 (p, *J* = 5.7 Hz, 2H).

#### 3-(4-Methoxybenzyloxy)-propanal (4b).

To a soln of oxalyl chloride (2.42 mL, 27.7 mmol) in CH<sub>2</sub>Cl<sub>2</sub> (75 mL) at -78 °C was added a soln of DMSO (3.94 mL, 55.5 mmol) in CH<sub>2</sub>Cl<sub>2</sub> (15 mL). The mixture was stirred at -78 °C for 5 min before a soln of **4a** (4.95 g, 25.2 mmol) in CH<sub>2</sub>Cl<sub>2</sub> (25 mL) was added. The mixture was stirred at -78 °C for 20 min before Et<sub>3</sub>N (17.6 mL, 126 mmol) was added and the mixture allowed to warm to rt. The mixture was diluted with Et<sub>2</sub>O (200 mL), washed with water (100 mL) and brine (100 mL), and the combined aqueous phases were extracted with Et<sub>2</sub>O (100 mL). The combined organic phases were dried over Na<sub>2</sub>SO<sub>4</sub>, filtered, and concentrated by rotary evaporation. The residue was dried by azeotropic removal of water with benzene to provide crude **4b** as a pale yellow oil which was used without further purification: <sup>1</sup>H NMR (CDCl<sub>3</sub>, 300 MHz): δ 9.77 (t, *J* = 1.8 Hz, 1H), 7.24 (d, *J* = 8.6 Hz, 2H), 6.87 (d, *J* = 8.6 Hz, 2H), 4.45 (s, 2H), 3.80 (s, 3H), 3.78 (t, *J* = 6.1 Hz, 2H), 2.67 (ddd, *J* = 6.1, 6.1, 1.8 Hz, 2H).

Supporting Information for  
*Stereoselective Synthesis of the C3-C17  
 Bis-Oxane Domain of Phorboxazole A*

**(E)-6-(4-Methoxybenzyloxy)-3-hexen-2-one (4c).**

To a suspension of LiCl (1.28 g, 30.2 mmol) in CH<sub>3</sub>CN (280 mL) was added dimethyl (2-oxopropyl)phosphonate (5.0 g, 30 mmol), *i*-Pr<sub>2</sub>NEt (4.40 mL, 25.2 mmol) and crude **4b** (ca. 5 g, 25 mmol). The mixture was stirred at rt for 18 h, then diluted with Et<sub>2</sub>O (200 mL), washed with water (70 mL) and brine (70 mL), and the combined aqueous phases were extracted with Et<sub>2</sub>O (150 mL). The combined organic phases were dried over Na<sub>2</sub>SO<sub>4</sub>, filtered and concentrated by rotary evaporation. Flash chromatography (3:1 hexanes-ethyl acetate) provided **4c** (4.88 g, 20.8 mmol, 83% for 2 steps) as a colorless oil: <sup>1</sup>H NMR (CDCl<sub>3</sub>, 300 MHz): δ 7.24 (d, *J* = 8.6 Hz, 2H), 6.87 (d, *J* = 8.6 Hz, 2H), 6.80 (ddd, *J* = 16.1, 6.8, 6.8 Hz, 1H), 6.11 (d, *J* = 16.1 Hz, 1H), 4.44 (s, 2H), 3.80 (s, 3H), 3.56 (t, *J* = 6.3 Hz, 2H), 2.50 (q, *J* = 6.5 Hz, 2H), 2.23 (s, 3H).

**(E)-2-(Triethylsilyloxy)-6-(4-methoxybenzyl)oxy-1,3-hexadiene (4).**

To a soln of diisopropylamine (6.50 mL, 49.6 mmol) in THF (80 mL) at 0 °C was added a soln of *n*-BuLi in hexanes (19.2 mL of a 2.58 M soln, 49.5 mmol). The soln was stirred at 0 °C for 15 min then cooled to -78 °C before a soln of **4c** (10.54 g, 44.99 mmol) in THF (10 mL) was added over 15 min. The soln was stirred at -78 °C for 15 min before chlorotriethylsilane (8.30 mL, 49.4 mmol) was added. The resulting soln was stirred at -78 °C for 30 min and then warmed to -20 °C over 2.2 h. The reaction mixture was diluted with pentane (600 mL) and washed with cold, saturated aqueous NaHCO<sub>3</sub> (100 mL) and brine (100 mL), and the combined aqueous phases were extracted with pentane (150 mL). The combined pentane phases were dried over MgSO<sub>4</sub>, filtered and concentrated by rotary evaporation. Flash chromatography on silica gel neutralized with Et<sub>3</sub>N (20:1 hexanes-ethyl acetate) afforded **4** (11.64 g, 33.39 mmol, 74%) as a colorless oil: R<sub>f</sub> 0.63 (5:1 hexanes-ethyl acetate); <sup>1</sup>H NMR (CDCl<sub>3</sub>, 300 MHz): δ 7.29 (d, *J* = 8.4 Hz, 2H), 6.90 (d, *J* = 8.4 Hz, 2H), 5.93-6.04 (m, 2H), 4.48 (s, 2H), 4.27 (s, 1H), 4.24 (s, 1H), 3.83 (s, 3H), 3.53 (t, *J* = 6.6 Hz, 2H), 2.44 (q, *J* = 6.6 Hz, 2H), 1.01 (t, *J* = 8.2 Hz, 9H), 0.74 (q, *J* = 8.2 Hz, 6H); <sup>13</sup>C NMR (CDCl<sub>3</sub>, 75 MHz): δ 159.1, 154.9, 130.5, 129.5, 129.3, 127.6, 113.8, 94.0, 72.6, 69.5, 55.3, 32.6, 6.8, 4.9; HRMS calcd for C<sub>20</sub>H<sub>32</sub>O<sub>3</sub>Si [M]<sup>+</sup>: 348.2121, found 348.2108.

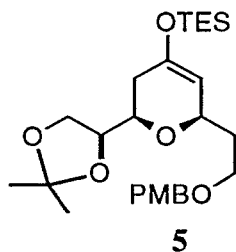

**Enol ether (5).**

To a soln of **4** (4.638 g, 13.31 mmol) and (*S*)-glyceraldehyde acetonide (3.52 g, 27 mmol) in Et<sub>2</sub>O (90 mL) at -78 °C was added BF<sub>3</sub>•OEt<sub>2</sub> (330 μL, 2.7 mmol). The soln was stirred at -78 °C for 30 min then quenched with saturated aqueous NaHCO<sub>3</sub> (10 mL). The mixture was diluted with ethyl acetate (120 mL), washed with water (40 mL) and brine (50 mL), and the combined aqueous phases were extracted with ethyl acetate (2 X 25 mL). The combined organic phases were dried over MgSO<sub>4</sub>, filtered and concentrated by rotary evaporation. Filtration through a plug of silica gel, neutralized with Et<sub>3</sub>N, and eluting with hexanes and 20:1 hexanes-ethyl acetate afforded **5** as a mixture of diastereomers (5.47 g, 11.4 mmol, 86%) which was used without further separation. Chromatographic purification provided an analytical sample of diastereomerically pure **5** as a colorless oil: R<sub>f</sub> 0.48 (5:1 hexanes-ethyl acetate); <sup>1</sup>H NMR (CDCl<sub>3</sub>, 300 MHz): δ 7.24 (d, *J* = 8.7 Hz, 2H), 6.87 (d, *J* = 8.7 Hz, 2H), 4.75 (s, 1H), 4.41 (s, 2H), 4.27 (m, 1H), 4.04 (m, 1H), 3.97 (m, 1H), 3.87 (m, 1H), 3.79 (s, 3H), 3.52 (m, 3H), 2.10 (m, 2H), 1.77 (m, 2H), 1.40 (s, 3H), 1.35 (s, 3H), 0.95 (t, *J* = 7.8 Hz, 9H), 0.64 (q, *J* = 7.8 Hz, 6H).

Supporting Information for  
*Stereoselective Synthesis of the C3-C17  
 Bis-Oxane Domain of Phorboxazole A*

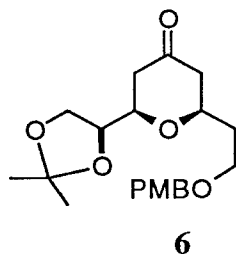

**Ketone (6).**

To a soln of **5** (5.47 g, 11.4 mmol) in THF (90 mL) at 0 °C was added a soln of tetra-*n*-butylammonium fluoride in THF neutralized (as indicated by pH paper) with TsOH·H<sub>2</sub>O (11.4 mL of a 1.0 M soln, 11 mmol). The soln was stirred for 10 min then diluted with Et<sub>2</sub>O (150 mL), washed with water (2 X 70 mL) and brine (70 mL), and the combined aqueous phases were extracted with Et<sub>2</sub>O (75 mL). The combined organic phases were dried over MgSO<sub>4</sub>, filtered and concentrated by rotary evaporation. Flash chromatography (3:1 hexanes-ethyl acetate) afforded **6** (2.903 g, 7.966 mmol, 60% from **4**) as a colorless oil: *R*<sub>f</sub> 0.32 (2:1 hexanes-ethyl acetate); [α]<sub>D</sub><sup>23</sup> = +16 (*c* 0.78, CHCl<sub>3</sub>); IR (neat): 2870, 1720, 1610, 1510, 1245 cm<sup>-1</sup>; <sup>1</sup>H NMR (CDCl<sub>3</sub>, 500 MHz): δ 7.24 (d, *J* = 8.5 Hz, 2H), 6.88 (d, *J* = 8.5 Hz, 2H), 4.44 (d, *J* = 11.8 Hz, 1H), 4.39 (d, *J* = 11.8 Hz, 1H), 4.07 (m, 2H), 3.80 (m, 5H), 3.58 (ddd, *J* = 8.8, 8.8, 5 Hz, 1H), 3.51 (m, 2H), 2.55 (ddd, *J* = 14.5, 2.3, 2.3 Hz, 1H), 2.38 (ddd, *J* = 14.5, 2.3, 2.3 Hz, 1H), 2.34 (dd, *J* = 14.5, 11.5 Hz, 1H), 2.27 (dd, *J* = 14.5, 11.5 Hz, 1H), 1.91 (dddd, *J* = 14.1, 8.5, 5.2, 5.2 Hz, 1H), 1.80 (dddd, *J* = 14.2, 8.4, 5.8, 4.1 Hz, 1H), 1.40 (s, 3H), 1.35 (s, 3H); <sup>13</sup>C NMR (CDCl<sub>3</sub>, 75 MHz): δ 206.6, 159.2, 130.3, 129.4, 113.8, 109.9, 77.6, 74.3, 72.7, 66.7, 65.5, 55.3, 47.8, 43.8, 36.4, 26.6, 25.1; HRMS calcd for C<sub>20</sub>H<sub>28</sub>O<sub>6</sub> [M]<sup>+</sup>: 364.1886, found 364.1895.

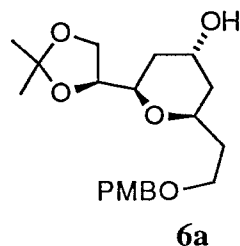

**Axial alcohol (6a).**

To a soln of **6** (2.850 g, 7.820 mmol) in THF (260 mL) at -78 °C was added a soln of potassium tri-*sec*-butylborohydride in THF (11.7 mL of a 1.0 M soln, 12 mmol). The soln was stirred for 30 min below -70 °C then warmed to -25 °C over 2 h. The reaction was quenched with aqueous NaOH (47 mL of a 1.0 M soln, 47 mmol) and aqueous H<sub>2</sub>O<sub>2</sub> (21 mL, 30 wt%) then warmed to 0 °C and stirred for 20 min. The mixture was diluted with water (600 mL) and extracted with CH<sub>2</sub>Cl<sub>2</sub> (4 X 90 mL) and the combined organic phases were dried over MgSO<sub>4</sub>, filtered and concentrated by rotary evaporation. Flash chromatography (1:1 hexanes-ethyl acetate) afforded **6a** (2.785 g, 7.600 mmol, 97%) as a colorless oil: *R*<sub>f</sub> 0.34 (1:1 hexanes-ethyl acetate); [α]<sub>D</sub><sup>23</sup> = +15.9 (*c* 1.12, CHCl<sub>3</sub>); IR (neat): 3450, 2900, 1510 cm<sup>-1</sup>; <sup>1</sup>H NMR (CDCl<sub>3</sub>, 300 MHz): δ 7.25 (d, *J* = 8.9 Hz, 2H), 6.87 (d, *J* = 8.9 Hz, 2H), 4.44 (d, *J* = 11.6 Hz, 1H), 4.40 (d, *J* = 11.6 Hz, 1H), 4.28 (m, 1H), 4.03 (dd, *J* = 8.1, 6.3 Hz, 1H), 3.92 (m, 2H), 3.81 (dd, *J* = 8.1, 5.4 Hz, 1H), 3.80 (s, 3H), 3.69 (ddd, *J* = 11.7, 6.9, 2.1 Hz, 1H), 3.53 (m, 2H), 1.84 (dddd, *J* = 14, 2.4, 2.4, 2.4 Hz, 1H), 1.59-1.76 (m, 3H), 1.42-1.55 (m, 2H), 1.40 (s, 3H), 1.34 (s, 3H); <sup>13</sup>C NMR (CDCl<sub>3</sub>, 75 MHz): δ 159.1, 130.5, 129.3, 113.7, 109.3, 78.1, 72.7, 72.6, 68.8, 67.0, 66.3, 64.1, 55.2, 38.7, 36.2, 34.8, 26.6, 25.3; HRMS calcd for C<sub>20</sub>H<sub>30</sub>O<sub>6</sub> [M+H]<sup>+</sup>: 367.2121, found 367.2091.

Supporting Information for  
*Stereoselective Synthesis of the C3-C17  
 Bis-Oxane Domain of Phorboxazole A*

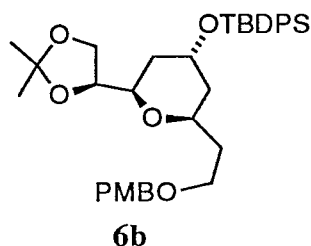

**TBDPS ether (6b).**

To a soln of **6a** (2.497 g, 6.814 mmol) in DMF (34 mL) was added imidazole (3.71 g, 54.5 mmol), 4-dimethylaminopyridine (100 mg, 819  $\mu$ mol) and *t*-butylchlorodiphenylsilane (7.10 mL, 27.3 mmol). The mixture was stirred at rt for 18 h then diluted with water (100 mL) and extracted with CH<sub>2</sub>Cl<sub>2</sub> (4 X 75 mL) and the combined organic phases were dried over MgSO<sub>4</sub>, filtered and concentrated by rotary evaporation. Flash chromatography (20:1-5:1 hexanes-ethyl acetate) afforded **6b** (3.853 g, 6.370 mmol, 93%) as a colorless oil: *R*<sub>f</sub> 0.32 (5:1 hexanes-ethyl acetate); [ $\alpha$ ]<sub>D</sub><sup>23</sup> = +7.9 (*c* 1.26, CHCl<sub>3</sub>); IR (neat): 3090, 2900, 1510 cm<sup>-1</sup>; <sup>1</sup>H NMR (CDCl<sub>3</sub>, 300 MHz):  $\delta$  7.65 (m, 4H), 7.33-7.45 (m, 6H), 7.27 (d, *J* = 8.7 Hz, 2H), 6.87 (d, *J* = 8.7 Hz, 2H), 4.47 (d, *J* = 11.4 Hz, 1H), 4.41 (d, *J* = 11.4 Hz, 1H), 4.23 (m, 1H), 3.96-4.15 (m, 2H), 3.88 (m, 3H), 3.81 (s, 3H), 3.54 (m, 2H), 1.51-1.84 (m, 4H), 1.41 (s, 3H), 1.35 (s, 3H), 1.21-1.34 (m, 2H), 1.09 (s, 9H); <sup>13</sup>C NMR (CDCl<sub>3</sub>, 75 MHz):  $\delta$  159.1, 135.73, 135.69, 134.2, 134.0, 130.7, 129.67, 129.65, 129.2, 127.6, 113.7, 109.3, 78.2, 72.9, 72.6, 69.4, 66.8, 66.6, 65.7, 55.2, 39.1, 36.3, 35.2, 27.0, 26.7, 25.4, 19.3; HRMS calcd for C<sub>36</sub>H<sub>48</sub>O<sub>6</sub>Si [M-H]<sup>+</sup> 603.3143, found 603.3160.

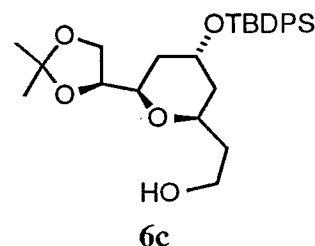

**Alcohol (6c).**

To a soln of **6b** (547 mg, 949  $\mu$ mol) in CH<sub>2</sub>Cl<sub>2</sub> (48 mL) was added *t*-BuOH (4.8 mL), aq. phosphate buffer (480  $\mu$ L, pH 7) and DDQ (431 mg, 1.90 mmol). The mixture was stirred at rt for 30 min then additional phosphate buffer (400  $\mu$ L, pH 7) and DDQ (140 mg, 617  $\mu$ mol) were added and stirring continued for 30 min. The reaction mixture was diluted Et<sub>2</sub>O (200 mL), washed with aqueous NaHCO<sub>3</sub> (100 mL), water (75 mL) and brine (75 mL), and the combined aqueous phases were extracted with Et<sub>2</sub>O (75 mL). The combined organic phases were dried over MgSO<sub>4</sub>, filtered through a plug of silica gel and concentrated by rotary evaporation. Flash chromatography (3:1-2:1 hexanes-ethyl acetate) afforded **6c** (444 mg, 916  $\mu$ mol, 97%) as a colorless oil: *R*<sub>f</sub> 0.35 (2:1 hexanes-ethyl acetate); <sup>1</sup>H NMR (CDCl<sub>3</sub>, 300 MHz):  $\delta$  7.64 (m, 4H), 7.39 (m, 6H), 4.21 (m, 2H), 3.90-4.05 (m, 4H), 3.76-3.90 (m, 2H), 2.65 (m, 1H), 1.46-1.78 (m, 4H), 1.43 (s, 3H), 1.35 (s, 3H), 1.22-1.41 (m, 2H), 1.08 (s, 9H); <sup>13</sup>C NMR (CDCl<sub>3</sub>, 75 MHz):  $\delta$  135.7, 135.6, 134.0, 133.8, 129.75, 129.73, 127.6, 109.3, 77.9, 72.9, 72.6, 66.1, 65.3, 61.6, 38.8, 37.6, 34.9, 27.0, 26.6, 25.2, 19.2; HRMS calcd for C<sub>28</sub>H<sub>40</sub>O<sub>5</sub>Si [M+H]<sup>+</sup> 485.2723, found 485.2734.

Supporting Information for  
*Stereoselective Synthesis of the C3-C17  
 Bis-Oxane Domain of Phorboxazole A*

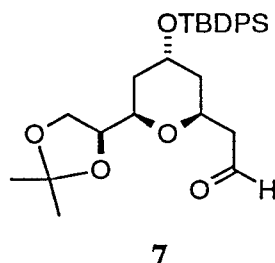

**Aldehyde (7).**

To a soln of **6c** (175 mg, 361  $\mu$ mol) in  $\text{CH}_2\text{Cl}_2$  (4 mL) at 0  $^\circ\text{C}$  was added  $\text{NaHCO}_3$  (300 mg, 3.57 mmol) and Dess-Martin periodinane (230 mg, 542  $\mu$ mol). The mixture was warmed to rt and stirred for 45 min before additional  $\text{NaHCO}_3$  (150 mg, 1.79 mmol) and Dess-Martin periodinane (230 mg, 542  $\mu$ mol) were added. Stirring was continued for 1.25 h before the reaction mixture was diluted  $\text{Et}_2\text{O}$  (25 mL), saturated aqueous  $\text{NaHCO}_3$  (10 mL) and 10% aqueous  $\text{Na}_2\text{S}_2\text{O}_3$  (10 mL) and allowed to stir for an additional 30 min. The layers were separated and the organic phase was washed with water (15 mL) and brine (15 mL), and the combined aqueous phases were extracted with  $\text{Et}_2\text{O}$  (20 mL). The combined organic phases were dried over  $\text{MgSO}_4$ , filtered and concentrated by rotary evaporation. Flash chromatography (6:1 hexanes-ethyl acetate) afforded **7** (139 mg, 288  $\mu$ mol, 80%) as a colorless oil:  $R_f$  0.64 (2:1 hexanes-ethyl acetate);  $^1\text{H}$  NMR ( $\text{CDCl}_3$ , 300 MHz):  $\delta$  9.79, (t,  $J$  = 2.4 Hz, 1H), 7.66, (m, 4H), 7.39 (m, 6H), 4.52 (dddd,  $J$  = 11.1, 8.7, 4.5, 2.1 Hz, 1H), 4.26 (m, 1H), 3.85-4.05 (m, 4H), 2.53 (ddd,  $J$  = 16.2, 8.6, 2.8 Hz, 1H), 2.38 (ddd,  $J$  = 16.2, 4.5, 1.8 Hz, 1H), 1.83 (m, 1H), 1.59 (m, 1H), 1.42 (s 3H), 1.35 (s, 3H), 1.25-1.40 (m, 2H), 1.10 (s, 9H);  $^{13}\text{C}$  NMR ( $\text{CDCl}_3$ , 75 MHz):  $\delta$  201.2, 135.7, 135.6, 133.8, 133.6, 129.8, 127.6, 109.3, 77.9, 73.0, 67.7, 66.6, 65.3, 49.4, 38.5, 34.6, 27.0, 26.6, 25.3, 19.2; HRMS calcd for  $\text{C}_{28}\text{H}_{38}\text{O}_5\text{Si}$   $[\text{M}+\text{H}]^+$  483.2566, found 483.2564.

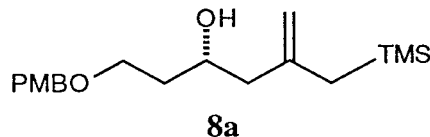

**Hydroxy silane (8a).**

To a soln of (*S*)-4-(4-methoxybenzyloxy)butan-1,2-diol (1.076 g, 4.755 mmol) in THF (60 mL) at 0  $^\circ\text{C}$  was added NaH (285 mg, 11.9 mmol) and the mixture warmed to rt and stirred for 1 h. The mixture was cooled to 0  $^\circ\text{C}$  and *N*-tosylimidazole (1.057 g, 4.755 mmol) was added in three equal portions over 20 min. The mixture was warmed to rt and stirred for 40 min before CuI (90 mg, 470  $\mu$ mol) was added and the mixture cooled to -40  $^\circ\text{C}$ . A soln of Grignard reagent prepared from 2-bromo-3-(trimethylsilyl)propene (2.87 mL, 16.6 mmol), magnesium (520 mg, 21.4 mmol) and THF (25 mL) was added. The mixture was warmed to -10  $^\circ\text{C}$  over 1.3 h and then quenched with aqueous  $\text{NaHCO}_3$  (2 mL). The mixture was diluted with ethyl acetate (150 mL), washed with water (75 mL) and brine (75 mL), and the combined aqueous phases were extracted with ethyl acetate (75 mL). The combined organic phases were dried over  $\text{MgSO}_4$ , filtered through a plug of silica gel and concentrated by rotary evaporation. Flash chromatography (5:1 hexanes-ethyl acetate) afforded **8a** (838 mg, 2.60 mmol, 55%) as a colorless oil:  $^1\text{H}$  NMR ( $\text{C}_6\text{D}_6$ , 500 MHz):  $\delta$  7.18 (d,  $J$  = 8.5 Hz, 2H), 6.78 (d,  $J$  = 8.5 Hz, 2H), 4.74 (m, 1H), 4.66 (m, 1H), 4.29 (d,  $J$  = 11.8 Hz, 1H), 4.26 (d,  $J$  = 11.8 Hz, 1H), 4.03 (m, 1H), 3.59 (ddd,  $J$  = 9.5, 5.8, 5.8 Hz, 1H), 3.49 (ddd,  $J$  = 9.5, 6, 6 Hz, 1H), 3.29 (s, 3H), 2.52 (d,  $J$  = 3 Hz, 1H), 2.21 (ddd,  $J$  = 13.5, 8, 1 Hz, 1H), 2.14 (ddd,  $J$  = 13.5, 5, 1 Hz, 1H), 1.75 (m, 2H), 1.53 (dd,  $J$  = 13, 1 Hz, 1H), 1.49 (dd,  $J$  = 13, 1 Hz, 1H), 0.01 (s, 9H).

Supporting Information for  
*Stereoselective Synthesis of the C3-C17  
 Bis-Oxane Domain of Phorboxazole A*

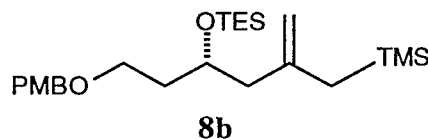

**TES ether silane (8b).**

To a soln of **8a** (601 mg, 1.86 mmol) in  $\text{CH}_2\text{Cl}_2$  (15 mL) was added imidazole (387 mg, 5.68 mmol), 4-dimethylaminopyridine (16 mg, 130  $\mu\text{mol}$ ), and chlorotriethylsilane (410  $\mu\text{L}$ , 2.44 mmol). The mixture was stirred at rt for 1 h, diluted with  $\text{Et}_2\text{O}$  (80 mL), washed with water (25 mL) and brine (25 mL), and the combined aqueous phases were extracted with  $\text{Et}_2\text{O}$  (20 mL). The combined organic phases were dried over  $\text{MgSO}_4$ , filtered and concentrated by rotary evaporation. Flash chromatography (20:1 hexanes-ethyl acetate) afforded **8b** (753 mg, 1.72 mmol, 93%) as a colorless oil:  $^1\text{H}$  NMR ( $\text{CDCl}_3$ , 300 MHz):  $\delta$  7.26 (d,  $J$  = 8.7 Hz, 2H), 6.87 (d,  $J$  = 8.7 Hz, 2H), 4.61 (m, 1H), 4.56 (m, 1H), 4.44 (d,  $J$  = 11.4 Hz, 1H), 4.39 (d,  $J$  = 11.4 Hz, 1H), 3.97 (dddd,  $J$  = 7.5, 7.5, 5.7, 4.2 Hz, 1H), 3.80 (s, 3H), 3.53 (t,  $J$  = 6.6 Hz, 2H), 2.18 (ddd,  $J$  = 13.5, 5.7, 0.9 Hz, 1H), 2.06 (ddd,  $J$  = 13.5, 7.5, 0.6 Hz, 1H), 1.88 (dddd,  $J$  = 14, 7.1, 7.1, 4.1 Hz, 1H), 1.63 (dddd,  $J$  = 14, 7.7, 6.1, 6.1 Hz, 1H), 1.54 (dd,  $J$  = 13.5, 0.9 Hz, 1H), 1.48 (dd,  $J$  = 13.2, 0.9 Hz, 1H), 0.95 (t,  $J$  = 7.8 Hz, 9H), 0.59 (q,  $J$  = 7.8 Hz, 6H), 0.01 (s, 9H);  $^{13}\text{C}$  NMR ( $\text{CDCl}_3$ , 75 MHz):  $\delta$  159.1, 144.0, 130.7, 129.3, 113.7, 110.0, 72.6, 68.5, 66.9, 55.3, 46.9, 36.9, 27.1, 7.0, 5.0, -1.4.

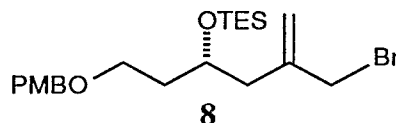

**TES bromide (8).**

To a soln of **8b** (157 mg, 359  $\mu\text{mol}$ ) in ethyl acetate (35 mL) at ca.  $-50^\circ\text{C}$  was added bromine dropwise until a light yellow color persisted. A soln of imidazole (100 mg, 1.47 mmol) in ethyl acetate (3 mL) was added quickly and the yellow color dissipated. The reaction mixture was warmed to  $0^\circ\text{C}$ , filtered through a plug of silica gel and washed with aqueous  $\text{NaHCO}_3$  (15 mL) and brine (15 mL), and the combined aqueous phases were extracted with ethyl acetate (15 mL). The combined organic phases were dried over  $\text{MgSO}_4$ , filtered and concentrated by rotary evaporation. Flash chromatography (25:1 hexanes-ethyl acetate) afforded **8** (122 mg, 275  $\mu\text{mol}$ , 77%) as a colorless oil:  $R_f$  0.38 (10:1 hexanes-ethyl acetate);  $^1\text{H}$  NMR ( $\text{CDCl}_3$ , 300 MHz):  $\delta$  7.25 (d,  $J$  = 8.7 Hz, 2H), 6.88 (d,  $J$  = 8.7 Hz, 2H), 5.23 (d,  $J$  = 1.2 Hz, 1H), 4.98 (d,  $J$  = 1.2 Hz, 1H), 4.44 (d,  $J$  = 11.4 Hz, 1H), 4.39 (d,  $J$  = 11.4 Hz, 1H), 3.95-4.05 (m, 3H), 3.81 (s, 3H), 3.51 (t,  $J$  = 6.3 Hz, 2H), 2.39 (dd,  $J$  = 6.3, 0.9 Hz, 2H), 1.61-1.83 (m, 2H), 0.95 (t,  $J$  = 8 Hz, 9H), 0.60 (q,  $J$  = 8 Hz, 6H);  $^{13}\text{C}$  NMR ( $\text{CDCl}_3$ , 75 MHz):  $\delta$  159.1, 142.6, 130.6, 129.3, 118.0, 113.7, 72.7, 68.1, 66.6, 55.3, 41.4, 37.4, 36.9, 6.9, 5.0; HRMS calcd for  $\text{C}_{21}\text{H}_{35}\text{O}_3\text{SiBr}$   $[\text{M}-\text{H}]^+$  441.1471, found 441.1453.

Supporting Information for  
 Stereoselective Synthesis of the C3-C17  
 Bis-Oxane Domain of Phorboxazole A

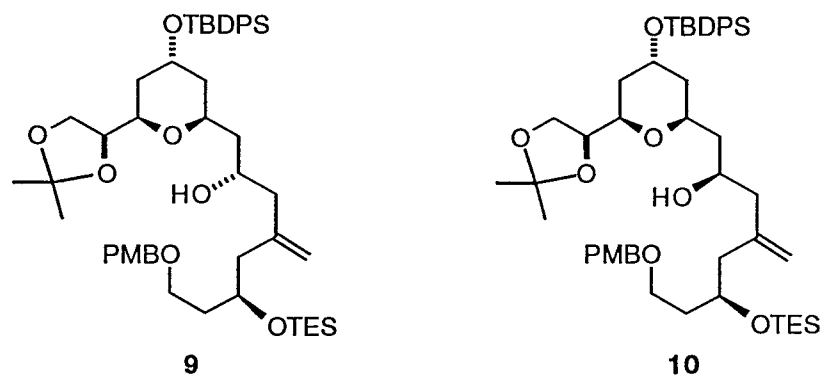

**Coupled products (9 and 10).**

To a suspension of  $\text{CrCl}_2$  (containing 1% w/w  $\text{NiCl}_2$ , 370 mg, 3.01 mmol) in THF (2 mL) was added a soln of **8** (446 mg, 1.01 mmol) in THF (4 mL) followed by a soln of **7** (200 mg, 414  $\mu\text{mol}$ ) in THF (4 mL). The mixture was stirred for 3.5 h then quenched with saturated aqueous  $\text{NaHCO}_3$  (2 mL). The mixture was diluted with ethyl acetate (75 mL), washed with water (25 mL) and brine (30 mL), and the combined aqueous phases were extracted with ethyl acetate (2 X 20 mL). The combined organic phases were dried over  $\text{MgSO}_4$ , filtered through a plug of silica gel and concentrated by rotary evaporation. Flash chromatography (10:1-6:1 hexanes-ethyl acetate) afforded **9** (163 mg, 192  $\mu\text{mol}$ , 46%) and **10** (117 mg, 138  $\mu\text{mol}$ , 33%) as colorless oils. Data for **9**:  $R_f$  0.24 (5:1 hexanes-ethyl acetate);  $^1\text{H}$  NMR ( $\text{CDCl}_3$ , 300 MHz):  $\delta$  7.65 (m, 4H), 7.39 (m, 6H), 7.26 (d,  $J = 8.4$  Hz, 2H), 6.88 (d,  $J = 8.4$  Hz, 2H), 4.90 (s, 2H), 4.45 (d,  $J = 11.7$  Hz, 1H), 4.40 (d,  $J = 11.7$  Hz, 1H), 4.33 (m, 1H), 4.26 (m, 1H), 3.90-4.06 (m, 6H), 3.80 (s, 3H), 3.53 (t,  $J = 6.5$  Hz, 2H), 2.82 (d,  $J = 3.3$  Hz, 1H), 2.24 (m, 4H), 1.43 (s, 3H), 1.35 (s, 3H), 1.24-1.90 (m, 8H), 1.09 (s, 9H), 0.96 (t,  $J = 7.9$  Hz, 9H), 0.60 (q,  $J = 7.9$  Hz, 6H);  $^{13}\text{C}$  NMR ( $\text{CDCl}_3$ , 75 MHz):  $\delta$  159.0, 143.6, 135.7, 135.6, 134.0, 133.9, 130.6, 129.68, 129.66, 129.2, 127.6, 114.9, 113.7, 109.3, 78.0, 73.0, 72.6, 69.8, 68.5, 66.6, 66.5, 66.4, 65.6, 55.2, 44.8, 44.2, 41.8, 38.6, 36.9, 34.9, 27.0, 26.6, 25.2, 19.2, 6.9, 5.0; HRMS calcd for  $\text{C}_{49}\text{H}_{74}\text{O}_8\text{Si}_2$   $[\text{M}+\text{H}]^+$  847.5003, found 847.4938.

Data for **10**:  $R_f$  0.19 (5:1 hexanes-ethyl acetate);  $^1\text{H}$  NMR ( $\text{CDCl}_3$ , 300 MHz):  $\delta$  7.65 (m, 4H), 7.39 (m, 6H), 7.26 (d,  $J = 8.7$  Hz, 2H), 6.87 (d,  $J = 8.7$  Hz, 2H), 4.90 (s, 2H), 4.45 (d,  $J = 11.4$  Hz, 1H), 4.40 (d,  $J = 11.4$  Hz, 1H), 4.23 (m, 2H), 3.88-4.08 (m, 6H), 3.80 (s, 3H), 3.57 (s, 1H), 3.54 (t,  $J = 6.6$  Hz, 2H), 2.10-2.34 (m, 4H), 1.47-1.91 (m, 6H), 1.43 (s, 3H), 1.35 (s, 3H), 1.29 (m, 2H), 1.09 (s, 9H), 0.96 (t,  $J = 7.8$  Hz, 9H), 0.61 (q,  $J = 7.8$  Hz, 6H);  $^{13}\text{C}$  NMR ( $\text{CDCl}_3$ , 75 MHz):  $\delta$  159.0, 143.3, 135.7, 135.6, 133.9, 133.7, 130.6, 129.75, 129.72, 129.2, 127.63, 127.62, 114.9, 113.7, 109.3, 77.8, 73.4, 72.8, 72.6, 69.9, 68.2, 66.7, 66.3, 65.2, 55.2, 44.5, 42.1, 39.2, 36.7, 34.9, 27.0, 26.6, 25.2, 19.2, 6.9, 5.0; HRMS calcd for  $\text{C}_{49}\text{H}_{74}\text{O}_8\text{Si}_2$   $[\text{M}+\text{H}]^+$  847.5003, found 847.5033.



Supporting Information for  
*Stereoselective Synthesis of the C3-C17  
 Bis-Oxane Domain of Phorboxazole A*

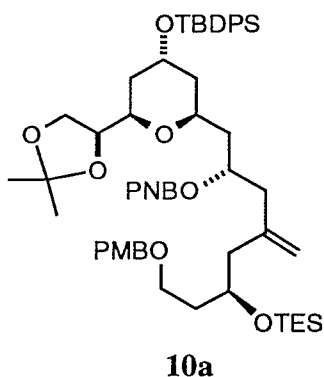

***p*-Nitrobenzoate (10a).**

To a soln of **10** (78 mg, 92  $\mu$ mol) in benzene (3 mL) was added PPh<sub>3</sub> (121 mg, 461  $\mu$ mol), 4-nitrobenzoic acid (69 mg, 410  $\mu$ mol) and diethyl azodicarboxylate (73  $\mu$ L, 460  $\mu$ mol). The mixture was stirred for 1.5 h then diluted with ethyl acetate (35 mL), washed with water (10 mL), and brine (10 mL), and the combined aqueous phases were extracted with ethyl acetate (10 mL). The combined organic phases were dried over MgSO<sub>4</sub>, filtered through a plug of silica gel and concentrated by rotary evaporation. Flash chromatography (7:1 hexanes-ethyl acetate) afforded samples of impure (42 mg) and pure **10a** (60 mg, >100% combined) as colorless oils: *R*<sub>f</sub> 0.70 (2:1 hexanes-ethyl acetate); <sup>1</sup>H NMR (CDCl<sub>3</sub>, 300 MHz):  $\delta$  8.25 (d, *J* = 8.9 Hz, 2H), 8.19 (d, *J* = 8.9 Hz, 2H), 7.56 (m, 4H), 7.39 (m, 2H), 7.32 (m, 4H), 7.24 (d, *J* = 8.6 Hz, 2H), 6.86 (d, *J* = 8.6 Hz, 2H), 5.60 (m, 1H), 4.85 (s, 1H), 4.82 (s, 1H), 4.43 (d, *J* = 11.6 Hz, 1H), 4.39 (d, *J* = 11.6 Hz, 1H), 4.23 (m, 1H), 3.82-4.08 (m, 5H), 3.79 (s, 3H), 3.74 (m, 1H), 3.52 (t, *J* = 6.8 Hz, 2H), 2.16-2.49 (m, 4H), 1.59-1.86 (m, 5H), 1.46 (m, 1H), 1.37 (s, 3H), 1.34 (s, 3H), 1.30 (m, 2H), 0.92 (m, 18H), 0.58 (q, *J* = 7.8 Hz, 6H); <sup>13</sup>C NMR (CDCl<sub>3</sub>, 75 MHz):  $\delta$  163.8, 159.0, 150.3, 142.0, 136.0, 135.6, 135.5, 133.9, 133.7, 130.64, 130.58, 129.71, 129.68, 129.2, 127.6, 123.4, 115.5, 113.7, 109.2, 77.9, 73.5, 72.6, 70.7, 68.5, 68.3, 67.1, 66.7, 65.6, 55.2, 44.3, 42.3, 40.8, 39.1, 36.9, 34.9, 26.8, 26.6, 25.2, 19.1, 6.9, 5.0.

To a soln of impure **10a** (102 mg, ca. 92  $\mu$ mol) in MeOH (6 mL) and CH<sub>2</sub>Cl<sub>2</sub> (600  $\mu$ L) was added K<sub>2</sub>CO<sub>3</sub> (20 mg, 140  $\mu$ mol). The mixture was stirred for 22 h then diluted with ethyl acetate (60 mL), washed with water (10 mL) and brine (10 mL), and the combined aqueous phases were extracted with ethyl acetate (20 mL). The combined organic phases were dried over MgSO<sub>4</sub>, filtered and concentrated by rotary evaporation. Flash chromatography (7:1-6:1 hexanes-ethyl acetate) afforded **9** (59 mg, 70  $\mu$ mol, 76% from **10**) that matched **9** prepared from **7** and **8** above.

Supporting Information for  
*Stereoselective Synthesis of the C3-C17  
 Bis-Oxane Domain of Phorboxazole A*

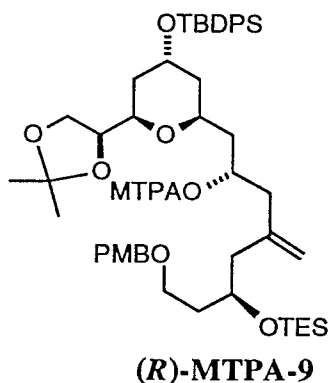

**(R)-Mosher Ester of 9 ((R)-MTPA-9).**

To a soln of **9** (6.1 mg, 7.2  $\mu$ mol) in  $\text{CH}_2\text{Cl}_2$  (800  $\mu$ L) was added 4-dimethylaminopyridine (13 mg, 110  $\mu$ mol) and (*S*)- $\alpha$ -methoxy- $\alpha$ -(trifluoromethyl)phenylacetyl chloride (6  $\mu$ L, 30  $\mu$ mol). The mixture was stirred for 30 min and then diluted with ethyl acetate (10 mL), washed with water (3 mL) and brine (3 mL), and the combined aqueous phases were extracted with ethyl acetate (5 mL). The combined organic phases were dried over  $\text{MgSO}_4$ , filtered and concentrated by rotary evaporation. Flash chromatography (6:1 hexanes-ethyl acetate) afforded **(R)-MTPA-9** (5.0 mg, 4.7  $\mu$ mol, 65%) as a pale yellow oil:  $^1\text{H}$  NMR ( $\text{CDCl}_3$ , 300 MHz):  $\delta$  7.59 (m, 6H), 7.38 (m, 9H), 7.24 (d,  $J$  = 8.6 Hz, 2H), 6.85 (d,  $J$  = 8.6 Hz, 2H), 5.55 (m, 1H), 4.85 (s, 2H), 4.42 (d,  $J$  = 11.7 Hz, 1H), 4.38 (d,  $J$  = 11.7 Hz, 1H), 4.17 (m, 1H), 3.90-4.06 (m, 4H), 3.86 (m, 1H), 3.78 (s, 3H), 3.76 (m, 1H), 3.53 (s, 3H), 3.51 (m, 2H), 2.47 (dd,  $J$  = 13.8, 6.6 Hz, 1H), 2.14-2.31 (m, 3H), 1.79 (m, 2H), 1.64 (m, 3H), 1.45 (m, 1H), 1.41 (s, 3H), 1.34 (s, 3H), 1.26 (m, 2H), 1.02 (s, 9H), 0.93 (t,  $J$  = 7.9 Hz, 9H), 0.56 (q,  $J$  = 7.9 Hz, 6H).

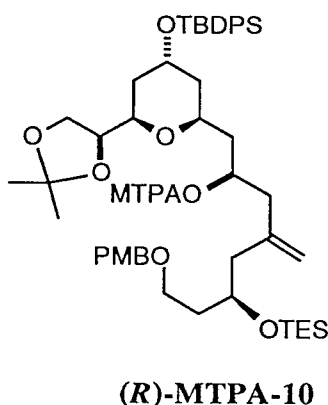

**(R)-Mosher Ester of 10 ((R)-MTPA-10)**

Compound **10** was treated as described above for **9** to afford **(R)-MTPA-10** (97%) as a pale yellow oil:  $^1\text{H}$  NMR ( $\text{CDCl}_3$ , 300 MHz):  $\delta$  7.62 (m, 4H), 7.52 (m, 2H), 7.38 (m, 9H), 7.24 (d,  $J$  = 8.4 Hz, 2H), 6.86 (d,  $J$  = 8.4 Hz, 2H), 5.40 (m, 1H), 4.76 (s, 2H), 4.43 (d,  $J$  = 11.4 Hz, 1H), 4.38 (d,  $J$  = 11.4 Hz, 1H), 4.20 (m, 1H), 3.81-4.10 (m, 6H), 3.79 (s, 3H), 3.51 (s, 3H), 3.49 (m, 2H), 2.32 (m, 2H), 2.17 (dd,  $J$  = 14.1, 6.3 Hz, 1H), 2.09 (dd,  $J$  = 13.8, 6.9 Hz, 1H), 1.54-1.91 (m, 6H), 1.40 (s, 3H), 1.33 (s, 3H), 1.26 (m, 2H), 1.05 (s, 9H), 0.94 (t,  $J$  = 7.9 Hz, 9H), 0.58 (q,  $J$  = 7.9 Hz, 6H).

Supporting Information for  
*Stereoselective Synthesis of the C3-C17  
 Bis-Oxane Domain of Phorboxazole A*

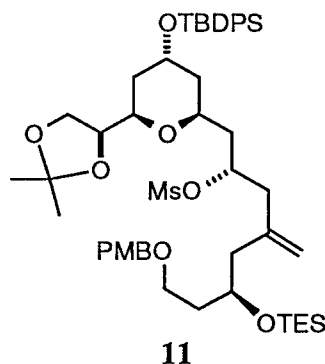

**Mesylate (11).**

To a soln of **9** (160 mg, 189  $\mu$ mol) in  $\text{CH}_2\text{Cl}_2$  (15 mL) at 0 °C was added  $\text{Et}_3\text{N}$  (260  $\mu$ L, 1.87 mmol) and  $\text{MsCl}$  (73  $\mu$ L, 940  $\mu$ mol). The mixture was stirred at 0 °C for 20 min and then quenched with saturated aqueous  $\text{NaHCO}_3$  (3 mL). The mixture was diluted with ethyl acetate (70 mL), washed with water (15 mL) and brine (15 mL), and the combined aqueous phases were extracted with ethyl acetate (15 mL). The combined organic phases were dried over  $\text{MgSO}_4$ , filtered and concentrated by rotary evaporation. Flash chromatography (7:1 hexanes-ethyl acetate) afforded **11** (168 mg, 182  $\mu$ mol, 96%) as a colorless oil:  $R_f$  0.64 (2:1 hexanes-ethyl acetate);  $^1\text{H}$  NMR ( $\text{C}_6\text{D}_6$ , 300 MHz):  $\delta$  7.72 (m, 4H), 7.21 (m, 8H), 6.78 (d,  $J$  = 8.4 Hz, 2H), 5.28 (m, 1H), 4.87 (s, 1H), 4.82 (s, 1H), 4.34 (m, 4H), 4.14 (m, 3H), 4.09 (dd,  $J$  = 8.4, 6.3 Hz, 1H), 3.89 (m, 1H), 3.44-3.61 (m, 2H), 3.27 (s, 3H), 2.55 (m, 1H), 2.51 (s, 3H), 2.24-2.40 (m, 3H), 1.70-1.98 (m, 3H), 1.54 (m, 1H), 1.45 (s, 3H), 1.30 (s, 3H), 1.16 (s, 9H), 1.01 (t,  $J$  = 7.8 Hz, 9H), 0.84-1.39 (m, 4H), 0.64 (q,  $J$  = 7.8 Hz, 6H);  $^{13}\text{C}$  NMR ( $\text{C}_6\text{D}_6$ , 75 MHz):  $\delta$  159.3, 142.2, 135.8, 135.7, 134.3, 134.0, 130.9, 129.7, 129.2, 127.8, 127.7, 115.9, 113.7, 108.9, 78.4, 77.1, 73.0, 72.5, 68.2, 67.1, 66.3, 65.8, 54.4, 44.2, 43.0, 40.9, 39.0, 37.7, 37.5, 35.7, 26.9, 26.6, 25.5, 19.2, 7.0, 5.2; HRMS calcd for  $\text{C}_{50}\text{H}_{76}\text{O}_{10}\text{Si}_2\text{S}$  [ $\text{M}+\text{Na}$ ] $^+$  947.45954, found 947.4560.

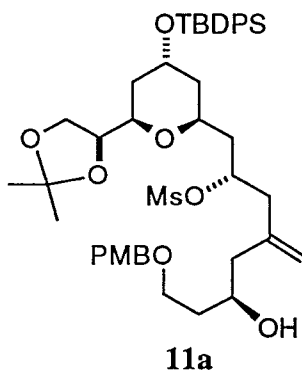

**Hydroxy mesylate (11a).**

To a soln of **11** (167 mg, 180  $\mu$ mol) in THF (8 mL) at 0 °C was added a soln of tetra-*n*-butylammonium fluoride in THF (270  $\mu$ L of a 1.0 M soln, 270  $\mu$ mol). The soln was stirred at 0 °C for 45 min then diluted with ethyl acetate (60 mL), washed with water (10 mL) and brine (10 mL), and the combined aqueous phases were extracted with ethyl acetate (10 mL). The combined organic phases were dried over  $\text{MgSO}_4$ , filtered and concentrated by rotary evaporation. Flash chromatography (2:1 hexanes-ethyl acetate) afforded **11a** (137 mg, 169  $\mu$ mol, 94%) as a colorless oil:  $R_f$  0.55 (1:1 hexanes-ethyl acetate);  $^1\text{H}$  NMR ( $\text{C}_6\text{D}_6$ , 300 MHz):  $\delta$  7.72 (m, 4H), 7.17 (m, 8H), 6.75 (d,  $J$  = 8.4 Hz, 2H), 5.31 (m, 1H), 4.84 (s, 1H), 4.81 (s, 1H), 4.35 (m, 1H), 4.28 (dd,  $J$  = 8.4, 6 Hz, 1H), 4.10-4.22 (m, 4H), 4.03 (dd,  $J$  = 8.1, 6.6 Hz, 1H), 3.97 (m, 1H), 3.86 (q,  $J$  =

Supporting Information for  
*Stereoselective Synthesis of the C3-C17  
 Bis-Oxane Domain of Phorboxazole A*

6.4 Hz, 1H), 3.36-3.52 (m, 2H), 3.27 (s, 3H), 2.73 (m, 1H), 2.61 (m, 1H), 2.56 (s, 3H), 2.10-2.36 (m, 3H), 1.88 (m, 1H), 1.48-1.70 (m, 3H), 1.46 (s, 3H), 1.28 (s, 3H), 1.15 (s, 9H), 0.84-1.41 (m, 4H);  $^{13}\text{C}$  NMR ( $\text{C}_6\text{D}_6$ , 75 MHz):  $\delta$  159.4, 142.6, 135.8, 135.7, 134.3, 134.0, 130.4, 129.7, 129.1, 127.8, 127.7, 115.6, 113.8, 108.9, 78.3, 77.4, 72.8, 72.7, 69.0, 68.3, 67.1, 66.8, 65.8, 54.4, 44.1, 42.9, 40.6, 38.9, 37.7, 36.7, 35.7, 26.9, 26.6, 25.4, 19.2; HRMS calcd for  $\text{C}_{44}\text{H}_{62}\text{O}_{10}\text{SiS}$   $[\text{M}+\text{Na}]^+$  833.3731, found 833.3718.

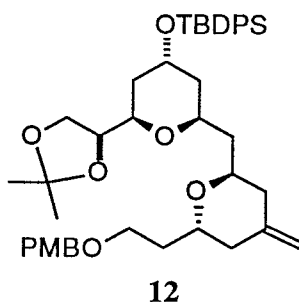

**Bispyran acetone (12).**

A soln of **11a** (136 mg, 168  $\mu\text{mol}$ ) in  $\text{CH}_3\text{CN}$  (11 mL) and  $\text{Et}_3\text{N}$  (1 mL) was heated to reflux for 47 h. The soln was cooled to rt, diluted with ethyl acetate (60 mL), washed with water (10 mL), and brine (10 mL), and the combined aqueous phases were extracted with ethyl acetate (2 X 10 mL). The combined organic phases were dried over  $\text{MgSO}_4$ , filtered, and concentrated by rotary evaporation. Flash chromatography (6:1 hexanes-ethyl acetate) afforded **12** (103 mg, 144  $\mu\text{mol}$ , 86%) as a pale yellow oil:  $R_f$  0.69 (2:1 hexanes-ethyl acetate);  $^1\text{H}$  NMR ( $\text{CDCl}_3$ , 500 MHz):  $\delta$  7.67 (m, 4H), 7.43 (m, 2H), 7.38 (t,  $J = 7.5$  Hz, 4H), 7.25 (d,  $J = 8.5$  Hz, 2H), 6.87 (d,  $J = 8.5$  Hz, 2H), 4.79 (s, 1H), 4.77 (s, 1H), 4.43 (d,  $J = 11.5$  Hz, 1H), 4.39 (d,  $J = 11.5$  Hz, 1H), 4.25 (m, 1H), 4.03 (m, 3H), 3.92 (m, 4H), 3.80 (s, 3H), 3.52 (m, 2H), 2.42 (dd,  $J = 13.5$ , 4.5 Hz, 1H), 2.34 (dd,  $J = 13.0$ , 4 Hz, 1H), 2.07 (dd,  $J = 13.5$ , 5.5 Hz, 1H), 2.02 (dd,  $J = 13.5$ , 7.5 Hz, 1H), 1.88 (m, 2H), 1.74 (m, 2H), 1.55 (m, 2H), 1.44 (s, 3H), 1.37 (s, 3H), 1.31 (m, 2H), 1.09 (s, 9H);  $^{13}\text{C}$  NMR ( $\text{CDCl}_3$ , 75 MHz):  $\delta$  159.0, 142.1, 135.7, 134.0, 133.9, 130.6, 129.7, 129.1, 127.6, 113.7, 110.2, 109.2, 78.1, 73.1, 72.6, 69.04, 68.96, 68.92, 66.9, 66.7, 65.7, 55.2, 40.0, 39.1, 38.8, 35.2, 34.1, 27.0, 26.7, 25.3, 19.2; HRMS calcd for  $\text{C}_{43}\text{H}_{58}\text{O}_7\text{Si}$   $[\text{M}+\text{H}]^+$  715.4032, found 715.3990.

Supporting Information for  
*Stereoselective Synthesis of the C3-C17  
 Bis-Oxane Domain of Phorboxazole A*

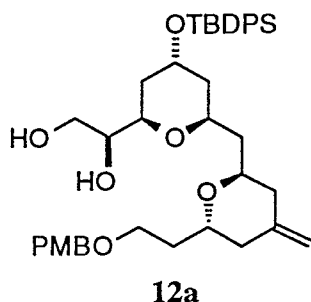

**Bispyran diol (12a).**

To a soln of **12** (103 mg, 144  $\mu$ mol) in MeOH (10 mL) was added TsOH $\cdot$ H<sub>2</sub>O (5 mg, 30  $\mu$ mol). The soln was stirred at rt for 7 h, then diluted with ethyl acetate (90 mL), washed with saturated aqueous NaHCO<sub>3</sub> (10 mL), water (10 mL), and brine (10 mL), and the combined aqueous phases were extracted with ethyl acetate (2 X 10 mL). The combined organic phases were dried over MgSO<sub>4</sub>, filtered and concentrated by rotary evaporation. Flash chromatography (1:1 hexanes-ethyl acetate) afforded **12a** (94.6 mg, 140  $\mu$ mol, 97%) as a pale yellow oil: *R*<sub>f</sub> 0.03 (2:1 hexanes-ethyl acetate); <sup>1</sup>H NMR (CDCl<sub>3</sub>, 500 MHz):  $\delta$  7.66 (d, *J* = 7.5 Hz, 4H), 7.43 (m, 2H), 7.38 (t, *J* = 7.5 Hz, 4H), 7.25 (d, *J* = 8.8 Hz, 2H), 6.87 (d, *J* = 8.8 Hz, 2H), 4.78 (s, 1H), 4.76 (s, 1H), 4.44 (d, *J* = 11.5 Hz, 1H), 4.40 (d, *J* = 11.5 Hz, 1H), 4.26 (m, 1H), 4.06 (m, 2H), 3.97 (m, 2H), 3.80 (s, 3H), 3.64 (m, 2H), 3.54 (m, 3H), 2.66 (m, 2H), 2.38 (dd, *J* = 13.5, 4.5 Hz, 1H), 2.34 (dd, *J* = 13.5, 4 Hz, 1H), 2.02 (m, 2H), 1.90 (dddd, *J* = 14, 6.7, 6.7, 6.7 Hz, 1H), 1.80 (ddd, *J* = 14.3, 7.3, 7.3 Hz, 1H), 1.72 (dddd, *J* = 13.1, 6.6, 6.6, 6.6 Hz, 1H), 1.59 (m, 2H), 1.47 (ddd, *J* = 14, 5.8, 5.8 Hz, 1H), 1.39 (ddd, *J* = 13.5, 11.5, 2.5 Hz, 1H), 1.28 (m, 1H), 1.10 (s, 9H); <sup>13</sup>C NMR (CDCl<sub>3</sub>, 75 MHz):  $\delta$  159.0, 141.9, 135.7, 133.9, 130.6, 129.7, 129.2, 127.6, 113.7, 110.3, 74.3, 73.5, 72.5, 69.8, 69.3, 69.2, 66.6, 65.7, 63.5, 55.2, 39.7, 39.4, 39.3, 39.0, 34.3, 33.7, 27.0, 19.2; HRMS calcd for C<sub>40</sub>H<sub>54</sub>O<sub>7</sub>Si [M+H]<sup>+</sup> 675.3719, found 675.3685.

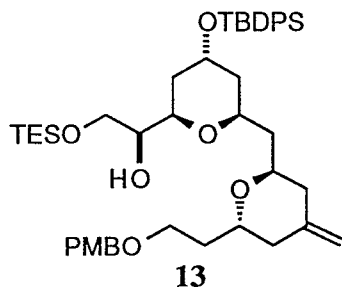

**Bispyran TES ether (13).**

To a soln of **12a** (94.4 mg, 140  $\mu$ mol) in CH<sub>2</sub>Cl<sub>2</sub> (5 mL) was added imidazole (28 mg, 410  $\mu$ mol). The soln was cooled to -78 °C, chlorotriethylsilane (28  $\mu$ L, 170  $\mu$ mol) was added and the mixture was stirred for 30 min. The mixture was diluted with Et<sub>2</sub>O (30 mL), washed with water (5 mL) and brine (5 mL), and the combined aqueous phases were extracted with Et<sub>2</sub>O (2 X 5 mL). The combined organic phases were dried over MgSO<sub>4</sub>, filtered and concentrated by rotary evaporation. Flash chromatography (6:1 hexanes-ethyl acetate) afforded **13** (91.5 mg, 116  $\mu$ mol, 83%) as a colorless oil: *R*<sub>f</sub> 0.56 (2:1 hexanes-ethyl acetate); <sup>1</sup>H NMR (CDCl<sub>3</sub>, 500 MHz):  $\delta$  7.67 (d, *J* = 8 Hz, 4H), 7.43 (m, 2H), 7.38 (t, *J* = 8 Hz, 4H), 7.24 (d, *J* = 8.5 Hz, 2H), 6.87 (d, *J* = 8.5 Hz, 2H), 4.80 (s, 1H), 4.76 (s, 1H), 4.42 (d, *J* = 11.5 Hz, 1H), 4.39 (d, *J* = 11.5 Hz, 1H), 4.27 (m, 1H), 3.90-4.06 (m, 4H), 3.80 (s, 3H), 3.71 (dd, *J* = 10, 4.5 Hz, 1H), 3.68 (dd, *J* = 10, 5.5 Hz, 1H), 3.52 (m, 3H), 2.49 (d, *J* = 5 Hz, 1H), 2.41 (dd, *J* = 13.5, 4.5 Hz, 1H), 2.34 (dd, *J* = 13, 4 Hz, 1H), 2.08 (dd, *J* = 13.5, 5.5 Hz, 1H), 2.04 (dd, *J* = 13, 7.5 Hz, 1H), 1.86 (m, 2H), 1.73 (m, 2H),

Supporting Information for  
*Stereoselective Synthesis of the C3-C17  
 Bis-Oxane Domain of Phorboxazole A*

1.55 (m, 2H), 1.39 (ddd,  $J = 13.5, 11.5, 2.5$  Hz, 1H), 1.29 (ddd,  $J = 13.5, 11.5, 2.5$  Hz, 1H), 1.10 (s, 9H), 0.99 (t,  $J = 8$  Hz, 9H), 0.64 (q,  $J = 8$  Hz, 6H);  $^{13}\text{C}$  NMR ( $\text{CDCl}_3$ , 75 MHz):  $\delta$  159.0, 142.2, 135.70, 135.68, 134.2, 134.0, 130.6, 129.6, 129.2, 127.6, 113.7, 110.2, 73.8, 72.6, 71.8, 69.05, 68.97, 68.8, 66.7, 65.9, 62.9, 55.2, 40.0, 39.1, 38.7, 34.5, 34.1, 27.0, 19.3, 6.7, 4.3; HRMS calcd for  $\text{C}_{46}\text{H}_{68}\text{O}_7\text{Si}_2$   $[\text{M}+\text{H}]^+$  789.4584, found 789.4521.

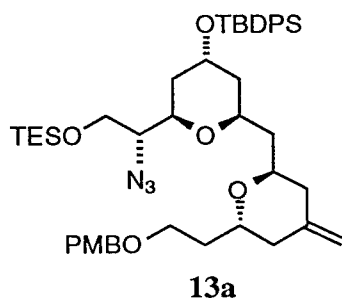

**Bispyran azide (13a).**

To a soln of **13** (91.3 mg, 116  $\mu\text{mol}$ ) in THF (5 mL) was added  $\text{PPh}_3$  (152 mg, 580  $\mu\text{mol}$ ), diethyl azodicarboxylate (91  $\mu\text{L}$ , 580  $\mu\text{mol}$ ), and diphenylphosphoryl azide (120  $\mu\text{L}$ , 557  $\mu\text{mol}$ ). The reaction was stirred for 30 min, then concentrated by rotary evaporation, and filtered through a plug of silica gel eluting with 5:1 hexanes-ethyl acetate. The filtrate was concentrated by rotary evaporation and the residue was dissolved in ethyl acetate (40 mL), washed with water (5 mL), and brine (5 mL), and the combined aqueous phases were extracted with ethyl acetate (10 mL). The combined organic phases were dried over  $\text{MgSO}_4$ , filtered and concentrated by rotary evaporation. Flash chromatography (15:1 hexanes-ethyl acetate) afforded **13a** (82.5 mg, 101  $\mu\text{mol}$ , 88%) as a colorless oil:  $R_f$  0.69 (2:1 hexanes-ethyl acetate);  $^1\text{H}$  NMR ( $\text{CDCl}_3$ , 500 MHz):  $\delta$  7.66 (d,  $J = 8$  Hz, 4H), 7.44 (m, 2H), 7.39 (t,  $J = 8$  Hz, 4H), 7.25 (d,  $J = 8.5$  Hz, 2H), 6.87 (d,  $J = 8.5$  Hz, 2H), 4.79 (s, 2H), 4.43 (d,  $J = 11.5$  Hz, 1H), 4.39 (d,  $J = 11.5$  Hz, 1H), 4.27 (m, 1H), 4.14 (ddd,  $J = 11.5, 3.3, 3.3$  Hz, 1H), 4.0 (m, 3H), 3.82 (dd,  $J = 10.5, 4.5$  Hz, 1H), 3.80 (s, 3H), 3.77 (dd,  $J = 10.5, 7.0$  Hz, 1H), 3.51 (m, 2H), 3.22 (ddd,  $J = 6.3, 4.8, 4.8$  Hz, 1H), 2.41 (dd,  $J = 13, 4.5$  Hz, 1H), 2.36 (dd,  $J = 13, 4$  Hz, 1H), 2.07 (dd,  $J = 13, 6$  Hz, 1H), 2.03 (dd,  $J = 13, 6.5$  Hz, 1H), 1.91 (m, 1H), 1.79 (ddd,  $J = 14, 6, 8$  Hz, 1H), 1.71 (m, 1H), 1.54 (m, 4H), 1.32 (ddd,  $J = 13.5, 11.5, 2.5$  Hz, 1H), 1.10 (s, 9H), 1.0 (t,  $J = 8$  Hz, 9H), 0.65 (q,  $J = 8$  Hz, 6H);  $^{13}\text{C}$  NMR ( $\text{CDCl}_3$ , 75 MHz):  $\delta$  159.0, 142.1, 135.6, 133.9, 130.6, 129.7, 129.2, 127.6, 113.6, 110.2, 72.6, 71.1, 69.2, 69.1, 68.6, 66.7, 66.6, 65.9, 62.7, 55.2, 39.8, 39.2, 38.8, 38.7, 35.5, 33.6, 27.0, 19.3, 6.7, 4.3.

Supporting Information for  
*Stereoselective Synthesis of the C3-C17  
 Bis-Oxane Domain of Phorboxazole A*

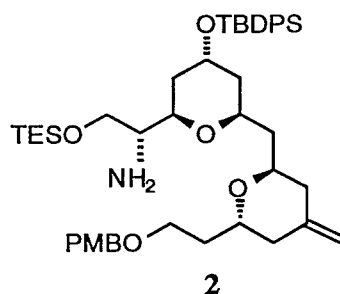

**Bispyran amine (2).**

To a soln of **13a** (82.3 mg, 101  $\mu\text{mol}$ ) in THF (4 mL) was added  $\text{PPh}_3$  (53 mg, 200  $\mu\text{mol}$ ) and water (18  $\mu\text{L}$ , 1.0 mmol). The soln was heated at reflux for 13 h, cooled to rt, additional water (35  $\mu\text{L}$ , 1.9 mmol) was added and the soln was heated at reflux for an additional 3 h. The soln was cooled to rt and concentrated by rotary evaporation. Flash chromatography on silica gel neutralized with  $\text{Et}_3\text{N}$  (1:1 hexanes-ethyl acetate) afforded **2** (70.3 mg, 89.2  $\mu\text{mol}$ , 88%) as a pale yellow oil:  $R_f$  0.23 (1:2 hexanes-ethyl acetate);  $[\alpha]^{23}_{\text{D}} = -17.7$  ( $c$  0.975,  $\text{CHCl}_3$ ); IR (neat): 3390, 3080, 2950, 1515, 1245  $\text{cm}^{-1}$ ;  $^1\text{H}$  NMR ( $\text{CDCl}_3$ , 500 MHz):  $\delta$  7.65 (m, 4H), 7.43 (m, 2H), 7.37 (m, 4H), 7.24 (d,  $J = 8.5$  Hz, 2H), 6.86 (d,  $J = 8.5$  Hz, 2H), 4.79 (s, 1H), 4.76 (s, 1H), 4.42 (d,  $J = 11.5$  Hz, 1H), 4.39 (d,  $J = 11.5$  Hz, 1H), 4.25 (m, 1H), 4.06 (m, 1H), 4.0 (m, 1H), 3.92 (m, 2H), 3.79 (s, 3H), 3.60 (dd,  $J = 10, 5$  Hz, 1H), 3.52 (m, 2H), 3.47 (dd,  $J = 9.5, 7$  Hz, 1H), 2.66 (q,  $J = 5.7$  Hz, 1H), 2.41 (dd,  $J = 13, 4.5$  Hz, 1H), 2.33 (dd,  $J = 13, 4$  Hz, 1H), 2.09 (dd,  $J = 13, 5$  Hz, 1H), 2.02 (dd,  $J = 13, 7.5$  Hz, 1H), 1.88 (m, 1H), 1.71 (m, 2H), 1.65 (m, 2H), 1.44-1.59 (m, 4H), 1.28 (ddd,  $J = 13.5, 11.5, 2$  Hz, 1H), 1.09 (s, 9H), 0.98 (t,  $J = 8$  Hz, 9H), 0.62 (q,  $J = 8$  Hz, 6H);  $^{13}\text{C}$  NMR ( $\text{CDCl}_3$ , 75 MHz):  $\delta$  159.0, 142.2, 135.7, 134.1, 130.6, 129.6, 129.2, 127.6, 113.7, 110.2, 72.6, 72.2, 69.1, 69.0, 68.6, 66.7, 66.1, 64.7, 57.0, 55.2, 40.0, 39.2, 39.1, 38.7, 35.4, 34.1, 27.0, 19.2, 6.8, 4.4; HRMS calcd for  $\text{C}_{46}\text{H}_{69}\text{O}_6\text{NSi}_2$   $[\text{M}+\text{H}]^+$  788.4744, found 788.4777.

## STANDARD PROTON PARAMETERS

exp1 s2pu1

| SAMPLE      |                | DEC. & VT  |         |
|-------------|----------------|------------|---------|
| date        | Aug 22 96      | dfrq       | 499.870 |
| solvent     | CDC13          | dn         | H1      |
| file        | /oldfid/4/cfo~ | dpwr       | 15      |
|             | rdc/rcii291    | dof        | 0       |
| ACQUISITION |                |            |         |
| sfrq        | 499.871        | dm         | nnn     |
| tn          | H1             | dmm        | c       |
| at          | 2.001          | dseq       | 200     |
| np          | 40000          | dres       | 1.0     |
| sw          | 9997.5         | homo       | n       |
| fb          | 6000           | PROCESSING |         |
| bs          | 16             | lb         | 0.10    |
| tpwr        | 58             | wtfile     |         |
| pw          | 7.5            | proc       | ft      |
| d1          | 1.500          | fn         | 131072  |
| tof         | 1504.1         | math       | f       |
| nt          | 16             |            |         |
| ct          | 16             | werr       |         |
| alock       | n              | wexp       | wft     |
| gain        | not used       | wbs        |         |
|             | FLAGS          | wnt        | wft     |
| il          | n              |            |         |
| in          | n              |            |         |
| dp          | y              |            |         |
| hs          | yn             |            |         |
| DISPLAY     |                |            |         |
| sp          | -108.5         |            |         |
| wp          | 4239.9         |            |         |
| vs          | 27             |            |         |
| sc          | 0              |            |         |
| wc          | 210            |            |         |
| hzmm        | 20.19          |            |         |
| is          | 33.57          |            |         |
| rt1         | 4618.8         |            |         |
| rfp         | 3619.1         |            |         |
| th          | 7              |            |         |
| ins         | 100.000        |            |         |
| ai          | cdc ph         |            |         |

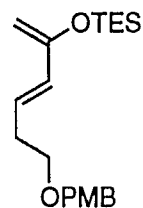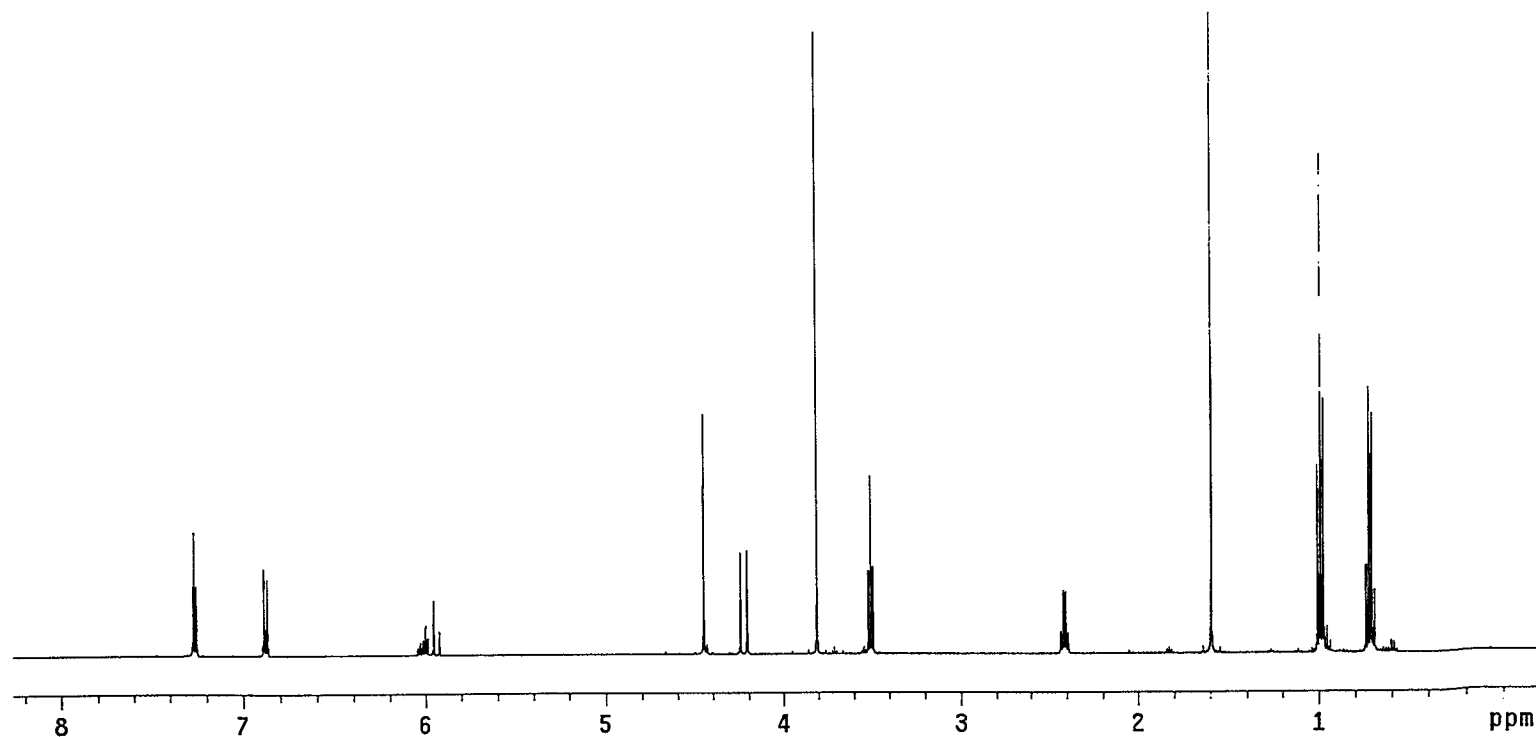



## STANDARD PROTON PARAMETERS

exp1 s2pu1

| SAMPLE      |                | DEC. & VT  |         |
|-------------|----------------|------------|---------|
| date        | Apr 18 96      | dfrq       | 499.870 |
| solvent     | CDC13          | dn         | H1      |
| file        | /oldfid/0/cfo~ | dpwr       | 15      |
|             | rdc/rc11193    | dof        | 0       |
| ACQUISITION |                |            |         |
| sfrq        | 499.871        | dmm        | nnn     |
| tn          | H1             | dmf        | c       |
| at          | 2.001          | dseq       | 200     |
| np          | 40000          | dres       | 1.0     |
| sw          | 9997.5         | homo       | n       |
| fb          | 6000           | PROCESSING |         |
| bs          | 16             | lb         | 0.10    |
| tpwr        | 58             | wtfile     |         |
| pw          | 7.5            | proc       | ft      |
| d1          | 1.500          | fn         | 131072  |
| tof         | 1504.1         | math       | f       |
| nt          | 16             |            |         |
| ct          | 16             | werr       |         |
| alock       | n              | wexp       | wft     |
| gain        | not used       | wbs        |         |
|             | FLAGS          | wnt        | wft     |
| il          | n              |            |         |
| in          | n              |            |         |
| dp          | y              |            |         |
| hs          | yn             |            |         |
| DISPLAY     |                |            |         |
| sp          | -108.5         |            |         |
| wp          | 4287.9         |            |         |
| vs          | 19             |            |         |
| sc          | 0              |            |         |
| wc          | 210            |            |         |
| hzmm        | 20.42          |            |         |
| ls          | 33.57          |            |         |
| rfl         | 4618.8         |            |         |
| rfp         | 3619.1         |            |         |
| th          | 7              |            |         |
| ins         | 100.000        |            |         |
| al          | cdc ph         |            |         |

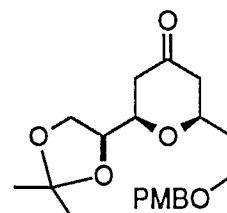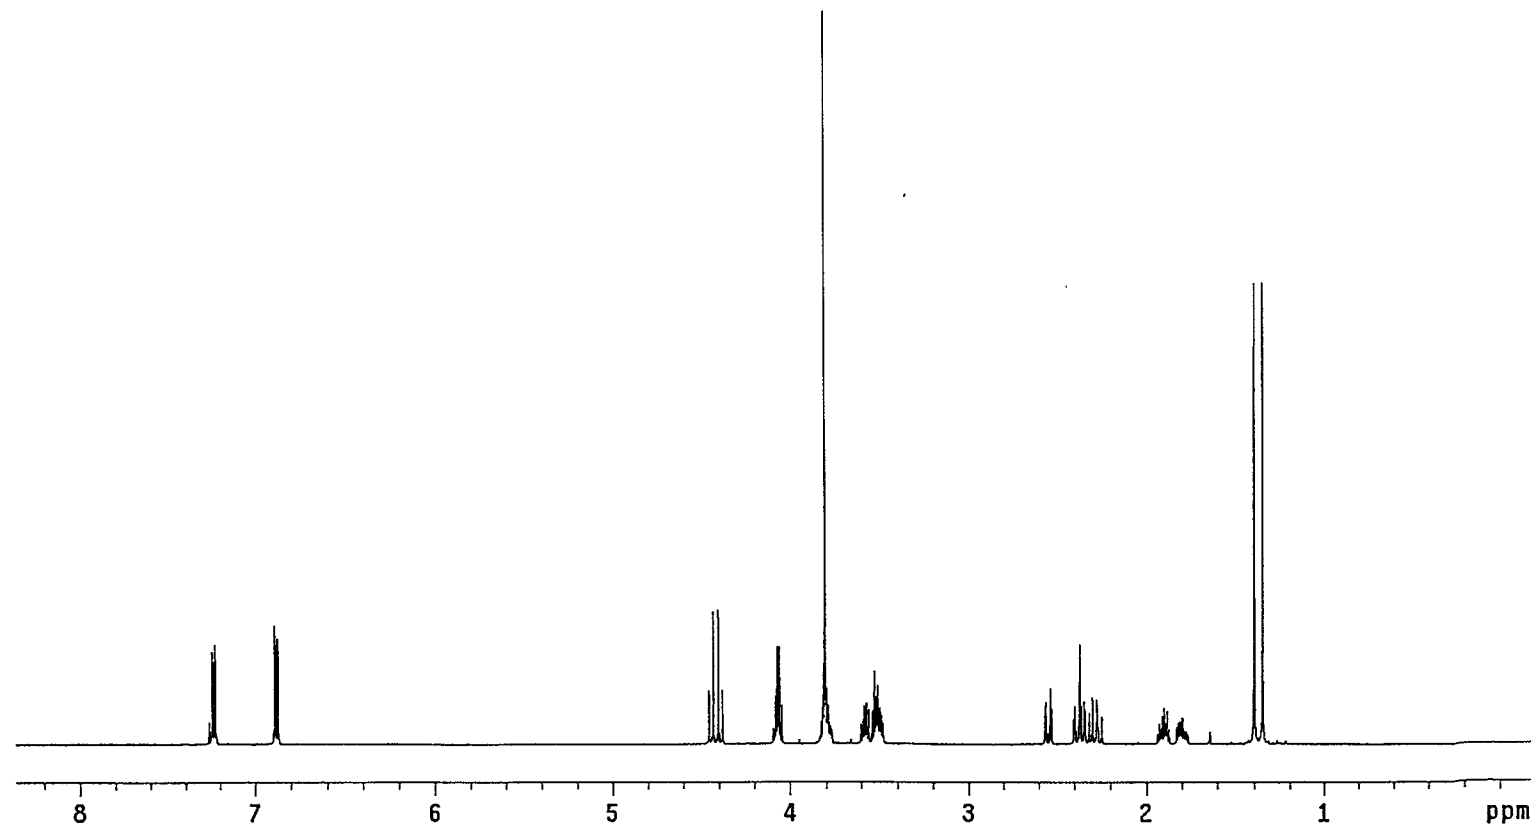

RC-III-18

expl stdih

```

SAMPLE
date Sep 25 96 dfrq 299.889
solvent CDCl3 dn H1
file /oldfid/4/cfo~ dpwr 30
rdc/rciii18_H1 dof 0
ACQUISITION dm nnn
sfrq 299.891 dmm c
tn H1 dmf 200
at 2.001 dseq undefined
np 24000 dres undefined
sw 5997.9 homo n
fb 3400
bs 16 lb 0.10
tpwr 63 wtfile
pw 9.5 proc ft
d1 1.500 fn 131072
tof 1322.9 math f
nt 16
ct 16 werr react('wait')
alock n wexp autolist('gli~
gain not used de', 'hi', 'c13 glid~
FLAGS e_c13_acq', 'dept g~
il n lide_dept_acq')
in n wbs
dp y wnt
hs yn
DISPLAY
sp -61.1
wp 2564.8
vs 60
sc 0
wc 225
hzmn 11.40
is 1363.56
rf1 2771.0
rfp 2171.2
th 2
ins 100.000
ai cdc ph
```

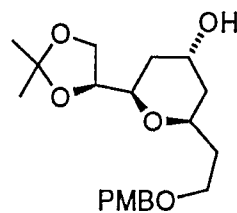

6a

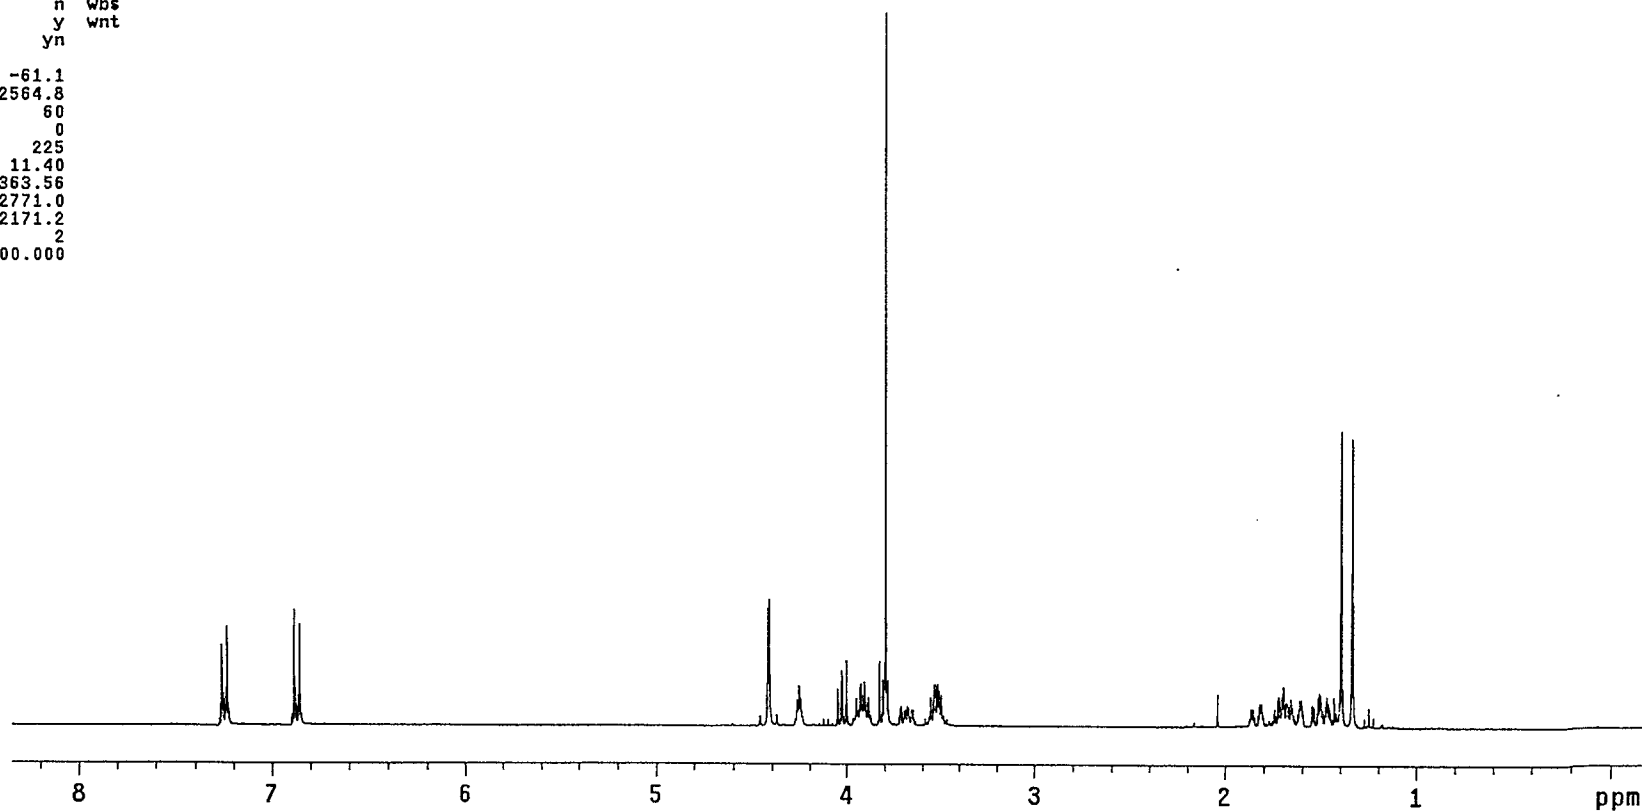

RC-III-21

exp1 stdih

```

SAMPLE          DEC. & VT
date    Sep 30 96  dfrq    299.889
solvent  CDC13      dn      H1
file  /oldfid/3/cfo~ dpwr    30
      rdc/rciii21_H1  dof     0
ACQUISITION      dm      nnn
sfrq    299.889    dmm      c
tn       H1        dmf     200
at       2.001     dseq    undefined
np       24000     dres    undefined
sw       5997.9    homo     n
fb       3400
bs       16        lb      0.10
tpwr     63        wtfile
pw       9.5       proc     ft
d1       1.500     fn      131072
tof      1322.9    math     f
nt       16
ct       16        werr react('wait')
alock    n         wexp autolst('gll~
gain      not used de', 'h1', 'c13 glid~
      FLAGS      e_c13_acq', 'dept g~
      il         n         lide_dept_acq')
      in         n         wbs
      dp         y         wnt
      hs         yn
DISPLAY
sp      -61.1
wp      2557.4
vs       76
sc       0
wc      225
hzmm    11.37
is      1282.93
rf1     2771.0
rfp     2171.2
th       2
ins     100.000
ai  cdc  ph
```

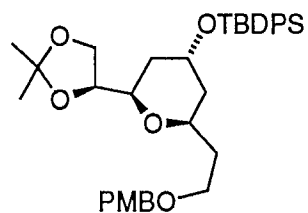

6b

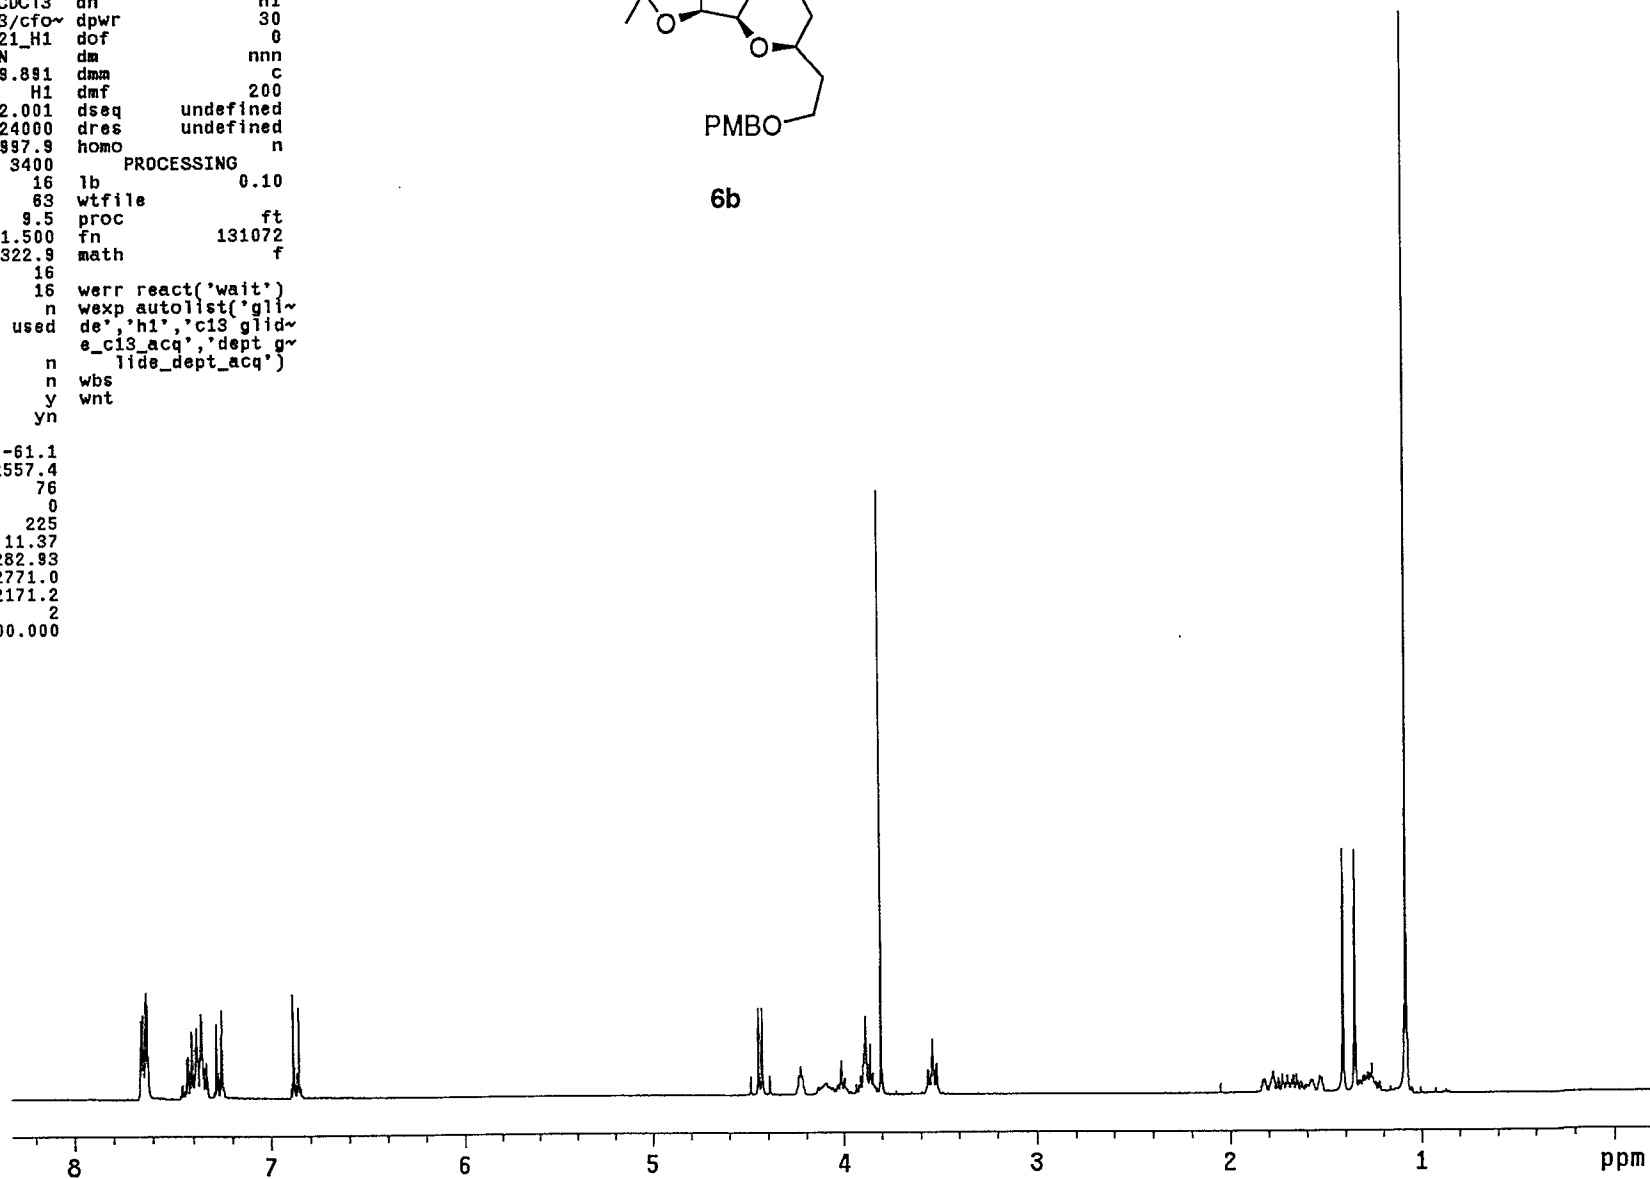

RC-II-229

exp1 std1h

```

SAMPLE          DEC. & VT
date    Jul 10 96  dfrq      299.889
solvent  CDC13      dn       H1
file  /oldfid/5/cfo~ dpwr      30
      rdc/rc11229_H1 dof       0
ACQUISITION dm      nnn
sfrq      299.891 dmm      c
tn         H1      dmf      200
at         2.001 dseq  undefined
np        24000 dres  undefined
sw        5997.9 homo      n
fb         3400
bs         16 lb      0.10
tpwr        63 wtfile
pw          9.5 proc      ft
d1         1.500 fn      131072
tof        1322.9 math      f
nt         16
ct         16 werr react('wait')
alock      n wexp autolist('gli~
gain      not used de','h1','c13 glid~
      FLAGS e_c13_acq','dept g~
            lide_dept_acq')
il         n
in         n wbs
dp         y wnt
hs         yn

DISPLAY
sp         -76.0
wp        2587.1
vs         78
sc          0
wc         225
hzmm      11.50
is        1167.86
rfl        2771.0
rfp        2171.2
th          2
ins       100.000
al cdc ph

```

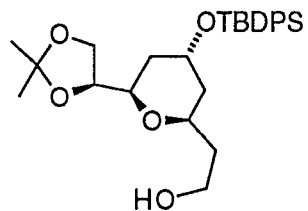

6c

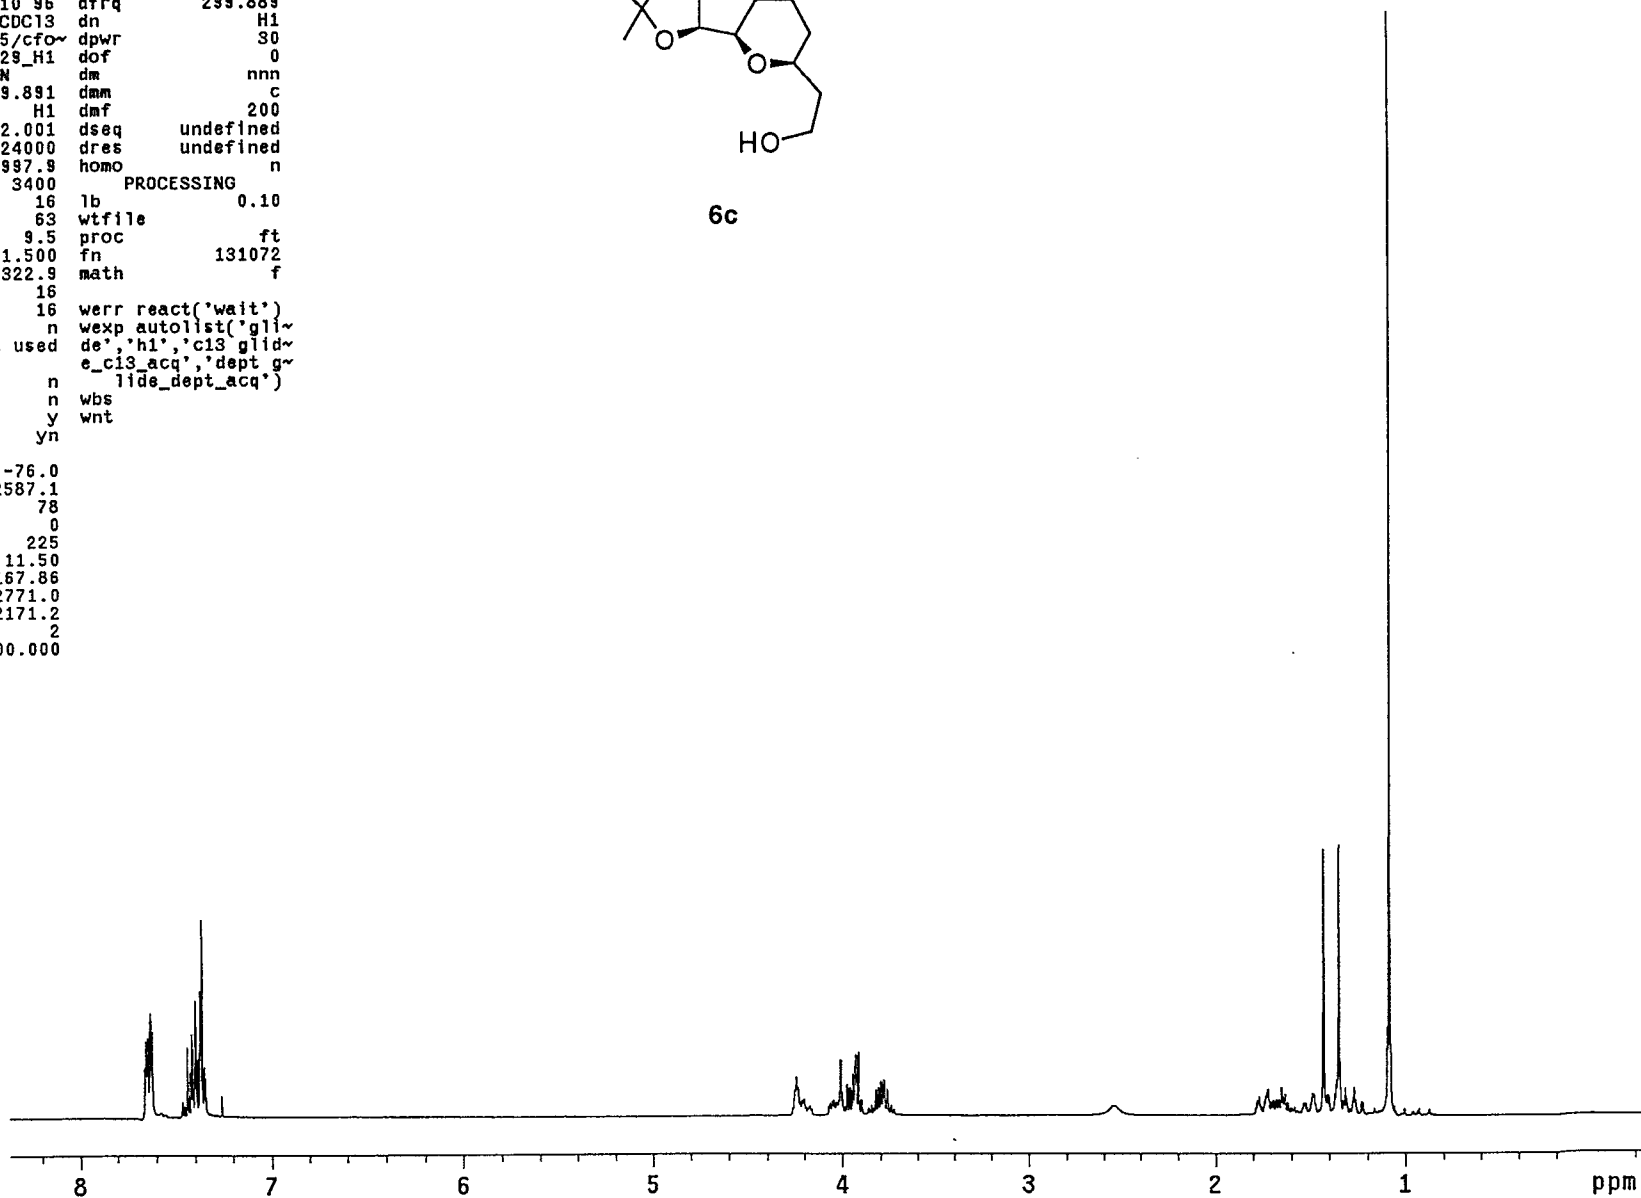

RC-II-251

exp1 std1h

```

SAMPLE          DEC. & VT
date    Jul 11 96  dfrq      299.889
solvent  CDC13      dn       H1
file  /oldfid/5/cfo~ dpwr      30
rdc/rcii251_H1  dof       0
ACQUISITION      dm       nnn
sfrq      299.891  dmm       c
tn         H1      dmf      200
at         2.001   dseq   undefined
np        24000    dres   undefined
sw        5997.9  homo     n
fb         3400
bs         16     PROCESSING
tpwr        63    lb       0.10
pw          9.5   wtfile
d1         1.500  fn       131072
tof        1322.9 math      f
nt         16
ct         16    werr react('wait')
alock      n     wexp autolist('gli~
gain      not used de','h1','c13 glid~
          FLAGS   e_c13_acq','dept g~
          n       ide_dept_acq')
          n       wbs
          y       wnt
          yn
DISPLAY
sp        -61.1
wp        3150.5
vs         91
sc         0
wc         225
h2mm      14.00
is        1126.85
rfl        2771.0
rfp        2171.2
th         2
ins       100.000
ai  cdc  ph
```

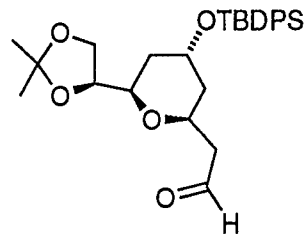

7

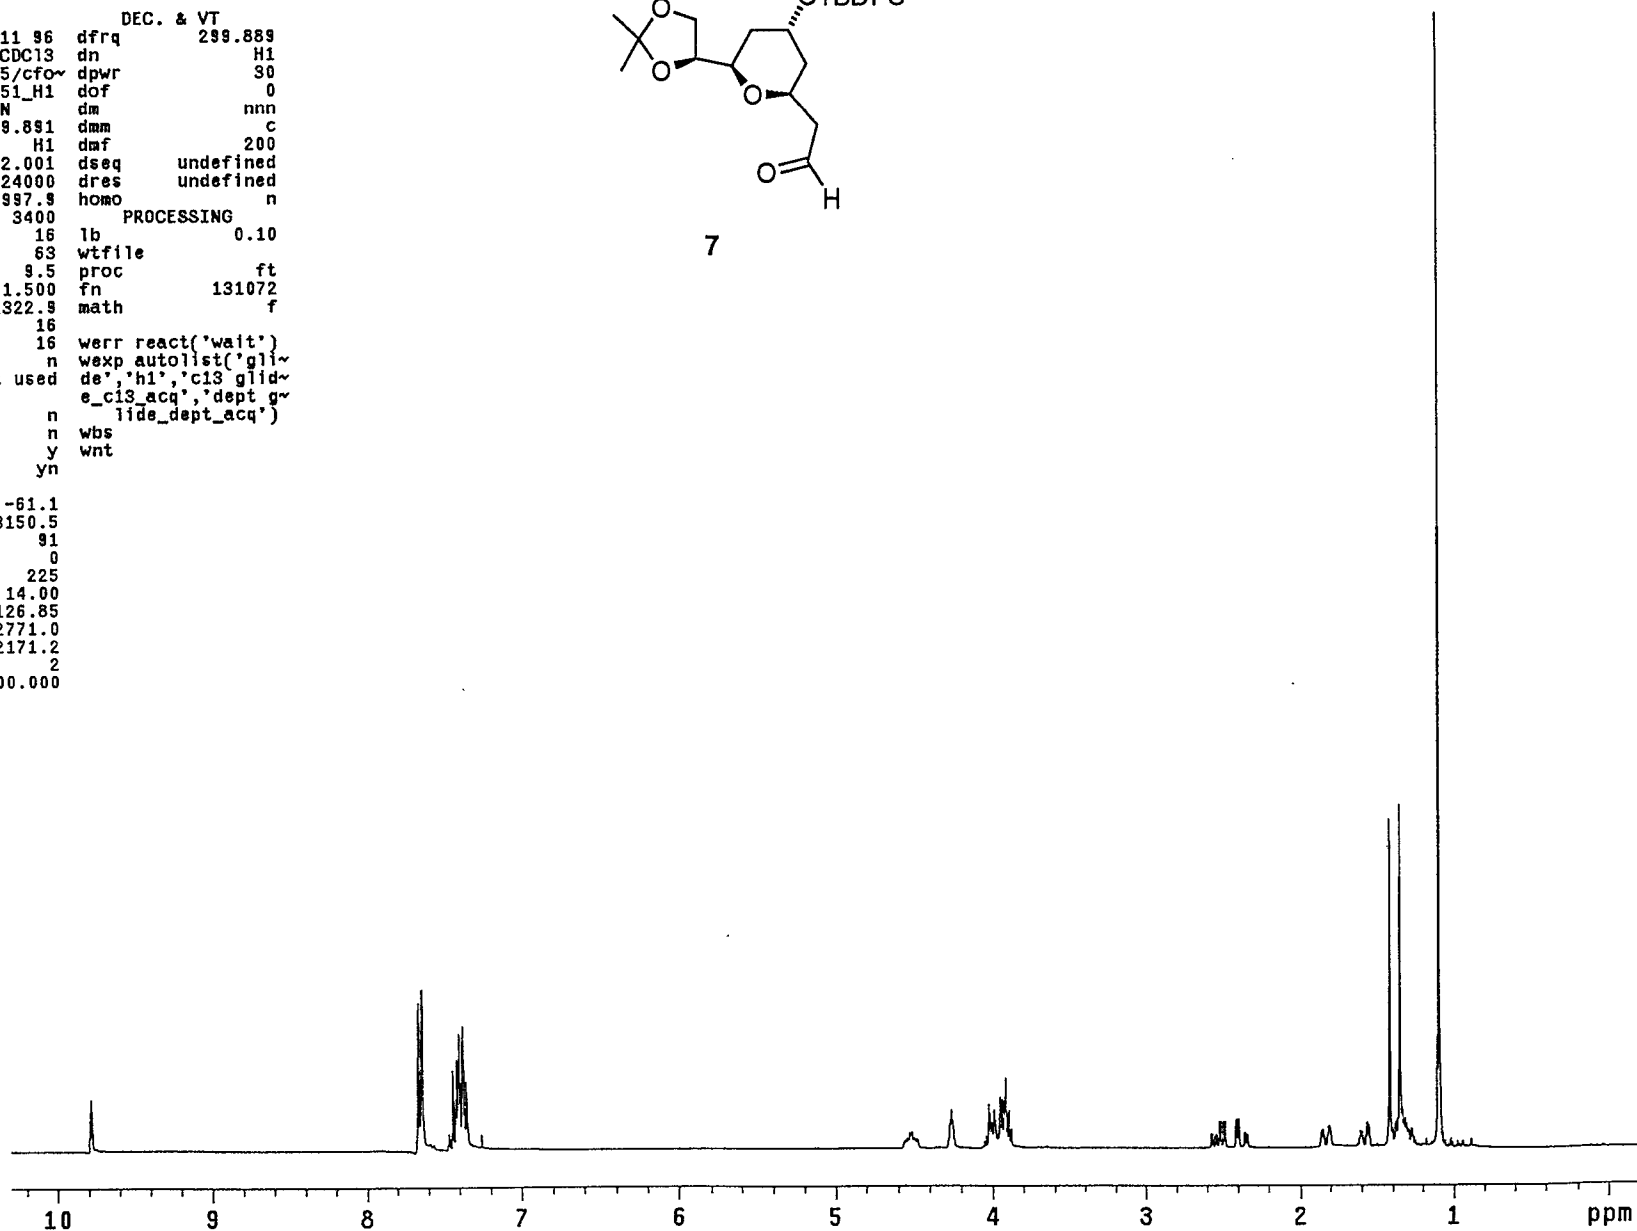

## STANDARD 1H OBSERVE

expl std1h

| SAMPLE      |                | DEC. & VT |           |
|-------------|----------------|-----------|-----------|
| date        | Apr 15 97      | dfrq      | 299.889   |
| solvent     | CDC13          | dn        | H1        |
| file        | /data/cfordc/~ | dpwr      | 30        |
|             | rc111167_h     | dof       | 0         |
| ACQUISITION |                |           |           |
| sfrq        | 299.891        | dm        | nnn       |
| tn          | H1             | dmm       | c         |
| at          | 2.000          | dmf       | 200       |
| np          | 24000          | dseq      | undefined |
| sw          | 6001.5         | dres      | undefined |
| fb          | not used       | homo      | n         |
| PROCESSING  |                |           |           |
| bs          | 16             | lb        | 0.10      |
| tpwr        | 63             | wtfile    |           |
| pw          | 12.2           | proc      | ft        |
| d1          | 1.500          | fn        | 65536     |
| tof         | 1317.4         | math      | f         |
| nt          | 32             |           |           |
| ct          | 32             | werr      |           |
| alock       | n              | wexp      | wft       |
| gain        | not used       | wbs       |           |
|             | FLAGS          | wnt       |           |
| il          | n              |           |           |
| in          | n              |           |           |
| dp          | y              |           |           |
| hs          | yn             |           |           |
| DISPLAY     |                |           |           |
| sp          | -41.5          |           |           |
| wp          | 2544.4         |           |           |
| vs          | 95             |           |           |
| sc          | 0              |           |           |
| wc          | 210            |           |           |
| hzmm        | 12.12          |           |           |
| is          | 500.00         |           |           |
| rfl         | 2778.3         |           |           |
| rfp         | 2171.2         |           |           |
| th          | 20             |           |           |
| ins         | 100.000        |           |           |
| nm          | cdc ph         |           |           |

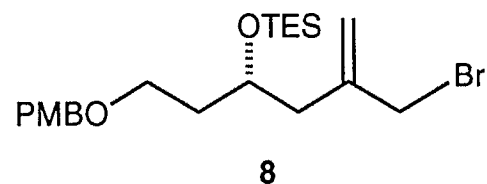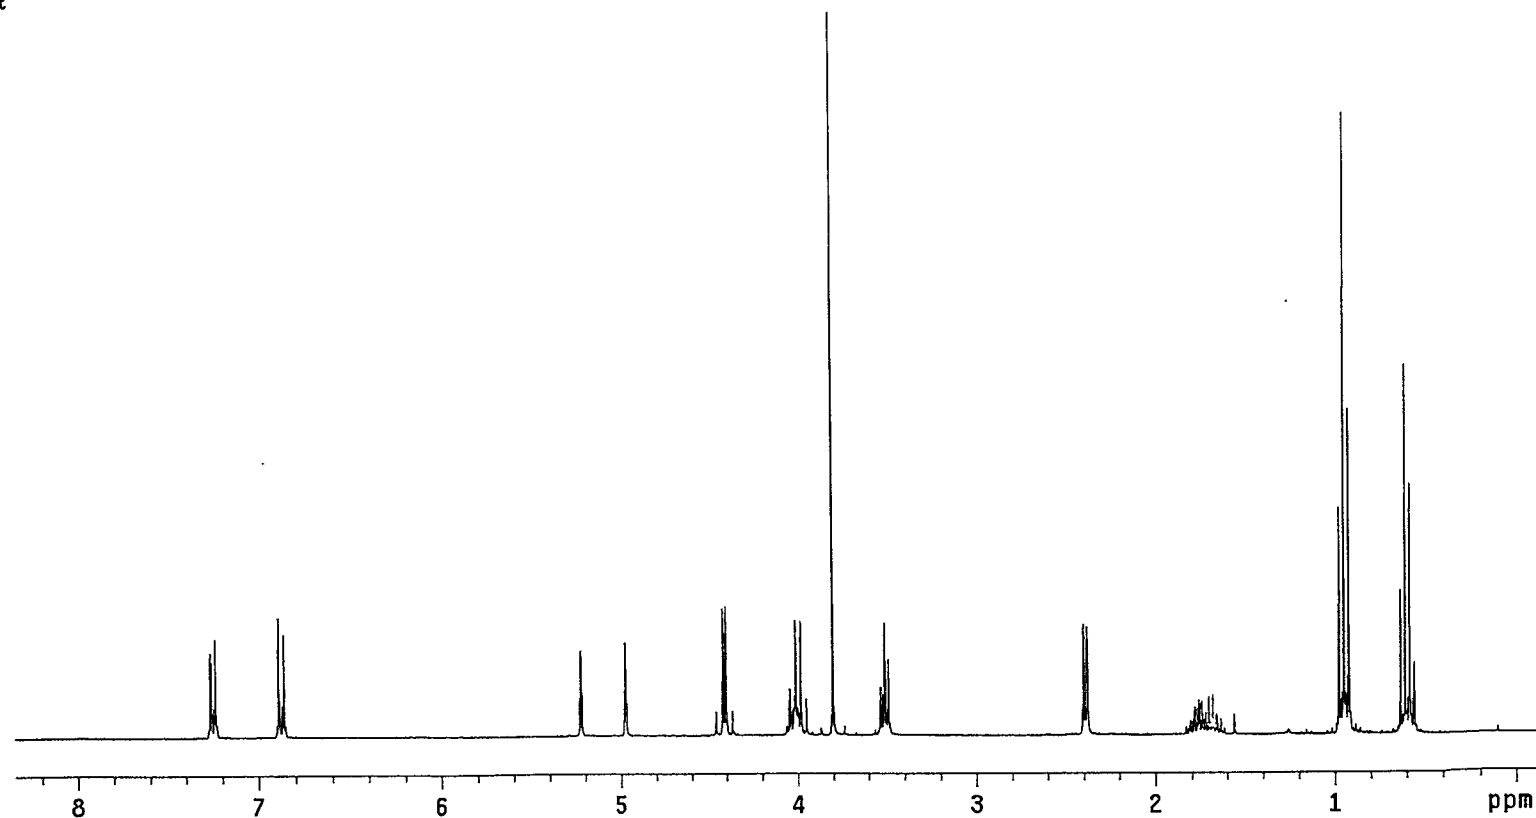

## STANDARD 1H OBSERVE

exp1 std1h

| SAMPLE      |                          | DEC. & VT  |         |
|-------------|--------------------------|------------|---------|
| date        | Apr 9 97                 | dfrq       | 300.170 |
| solvent     | CDC13                    | dn         | H1      |
| file        | /data/cfordc/~rcii168_1h | dpwr       | 30      |
| ACQUISITION |                          | dof        | 0       |
| sfrq        | 300.171                  | dm         | nnn     |
| tn          | H1                       | dmm        | C       |
| at          | 1.999                    | dmf        | 200     |
| np          | 24000                    | dseq       |         |
| sw          | 6003.3                   | dres       | 1.0     |
| fb          | 3000                     | homo       | n       |
| bs          | 16                       | PROCESSING |         |
| tpwr        | 55                       | lb         | 0.10    |
| pw          | 17.0                     | wtfile     |         |
| d1          | 1.500                    | proc       | ft      |
| tof         | 900.5                    | fn         | 131072  |
| nt          | 16                       | math       | f       |
| ct          | 16                       | werr       |         |
| alock       | s                        | wexp       | wft     |
| gain        | not used                 | wbs        |         |
| FLAGS       |                          | wnt        |         |
| il          | n                        |            |         |
| in          | n                        |            |         |
| dp          | y                        |            |         |
| hs          | nn                       |            |         |
| DISPLAY     |                          |            |         |
| sp          | -79.6                    |            |         |
| wp          | 2618.2                   |            |         |
| vs          | 164                      |            |         |
| sc          | 0                        |            |         |
| wc          | 210                      |            |         |
| hzmm        | 12.47                    |            |         |
| is          | 500.00                   |            |         |
| rfl         | 2773.5                   |            |         |
| rfp         | 2173.2                   |            |         |
| th          | 20                       |            |         |
| ins         | 100.000                  |            |         |
| nm          | cdc ph                   |            |         |

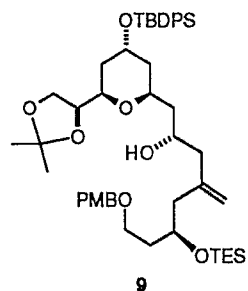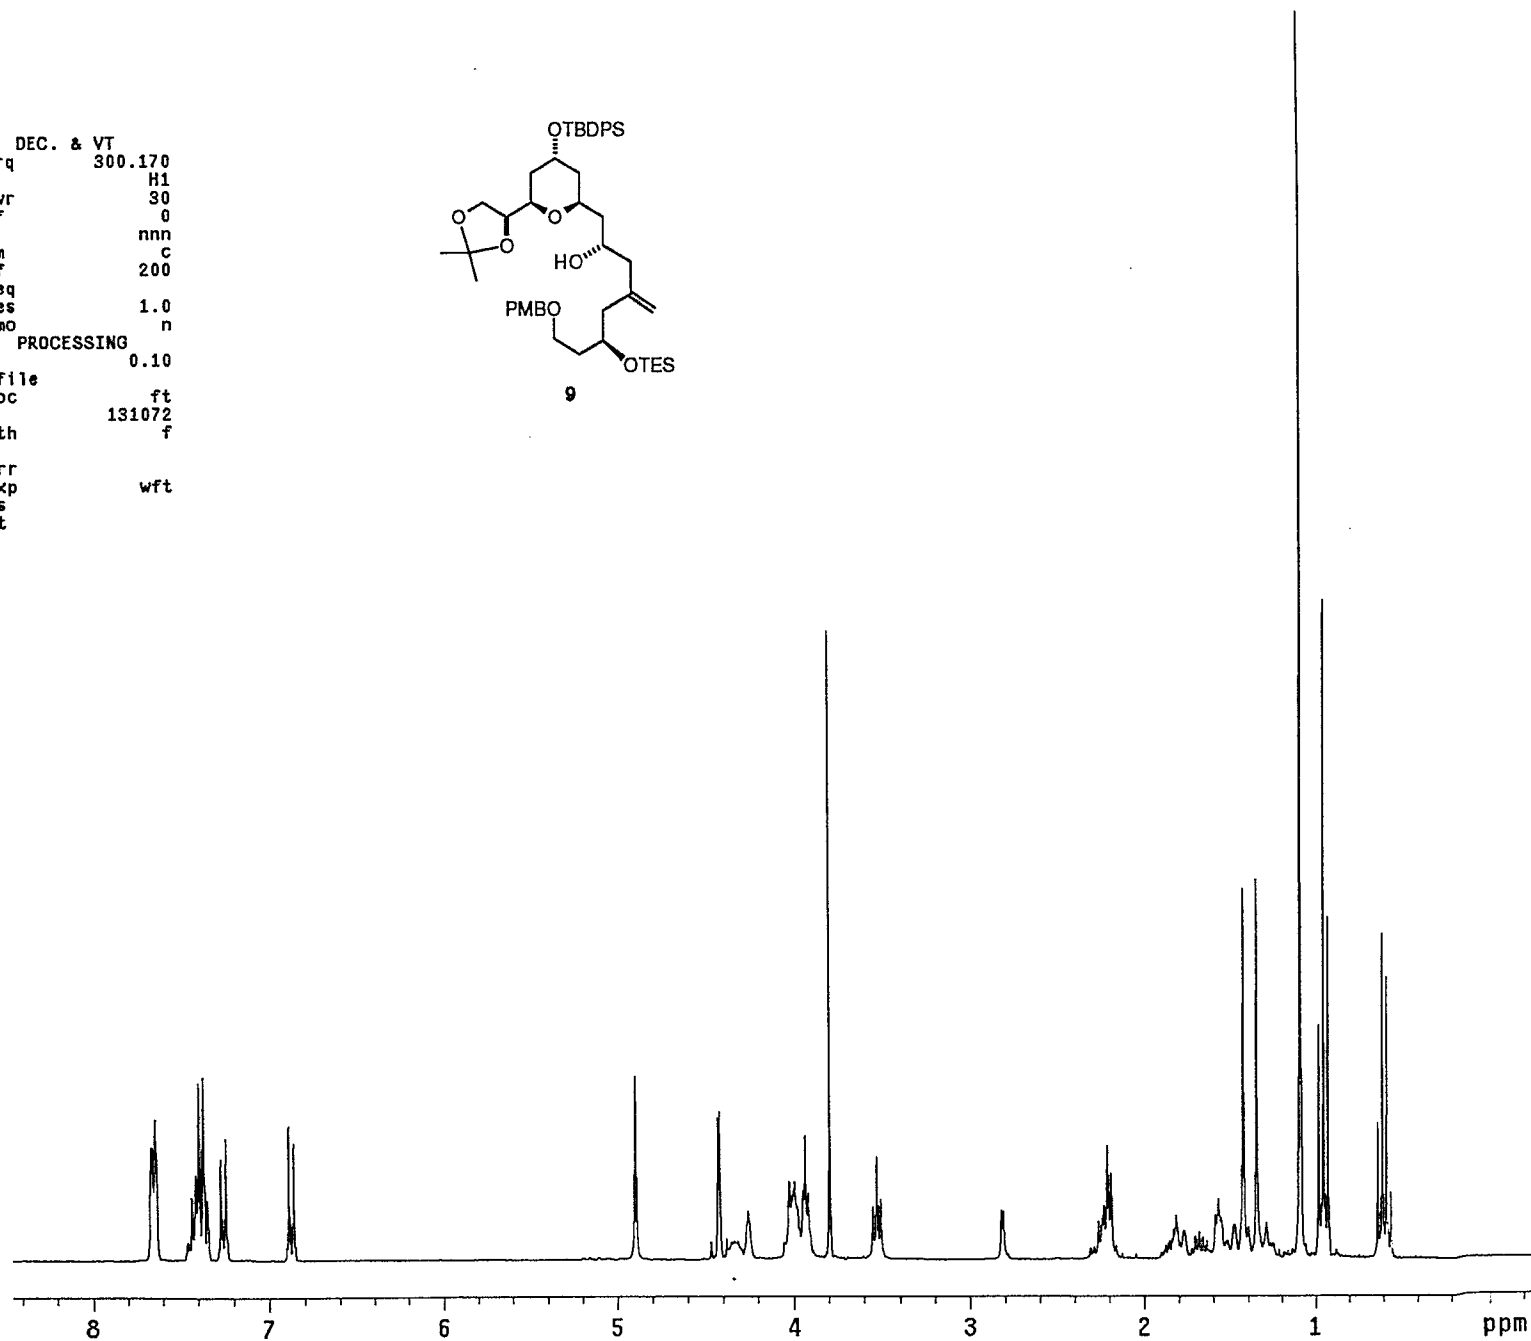

## STANDARD 1H OBSERVE

exp1 std1h

| SAMPLE      |                | DEC. & VT  |         |
|-------------|----------------|------------|---------|
| date        | Apr 9 97       | dfrq       | 300.170 |
| solvent     | CDC13          | dn         | H1      |
| file        | /data/cfordc/~ | dpwr       | 30      |
|             | rc111168_2h    | dof        | 0       |
| ACQUISITION |                | dm         | nnn     |
| sfrq        | 300.171        | dmm        | c       |
| tn          | H1             | dmf        | 200     |
| at          | 1.999          | dseq       |         |
| np          | 24000          | dres       | 1.0     |
| sw          | 6003.3         | homo       | n       |
| fb          | 3000           | PROCESSING |         |
| bs          | 16             | lb         | 0.10    |
| tpwr        | 55             | wtfile     |         |
| pw          | 17.0           | proc       | ft      |
| d1          | 1.500          | fn         | 131072  |
| tof         | 900.5          | math       | f       |
| nt          | 16             |            |         |
| ct          | 16             | werr       |         |
| alock       | s              | wexp       | wft     |
| gain        | not used       | wbs        |         |
| FLAGS       |                | wnt        |         |
| il          | n              |            |         |
| in          | n              |            |         |
| dp          | y              |            |         |
| hs          | nn             |            |         |
| DISPLAY     |                |            |         |
| sp          | -50.7          |            |         |
| wp          | 2574.8         |            |         |
| vs          | 137            |            |         |
| sc          | 0              |            |         |
| wc          | 210            |            |         |
| hzmm        | 12.26          |            |         |
| ls          | 500.00         |            |         |
| rfl         | 2773.5         |            |         |
| rfp         | 2173.2         |            |         |
| th          | 20             |            |         |
| ins         | 100.000        |            |         |
| nm          | cdc ph         |            |         |

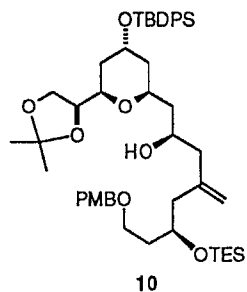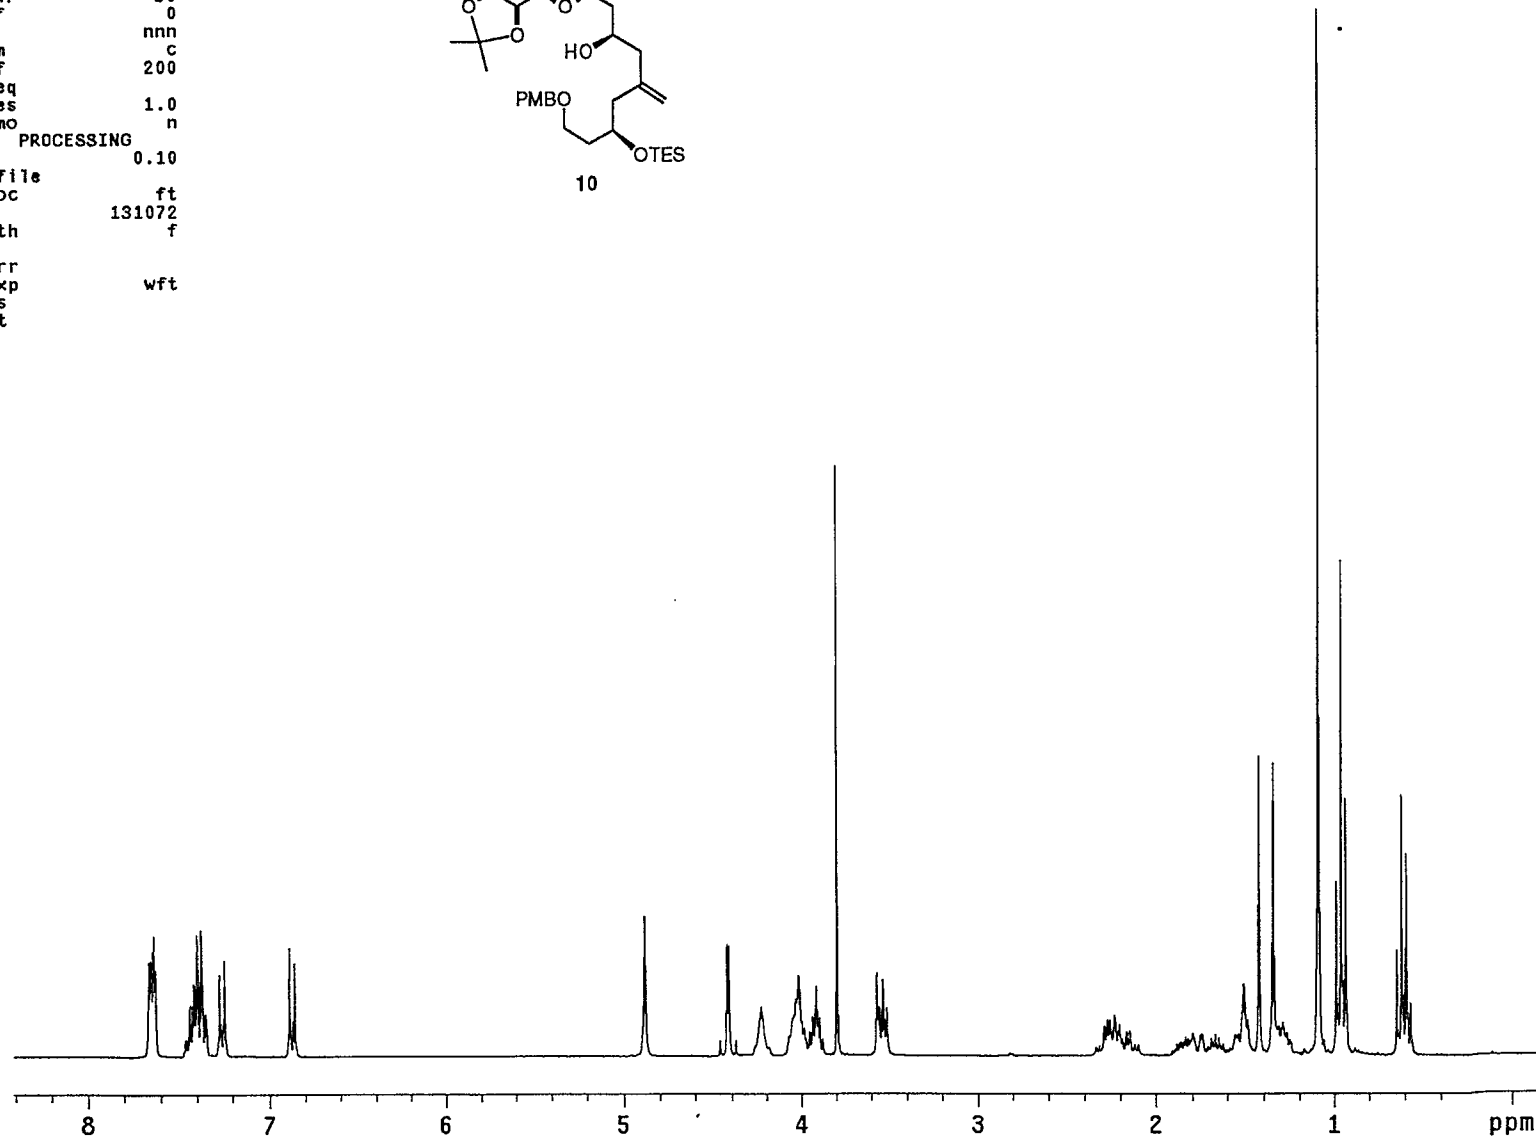



## STANDARD 1H OBSERVE

exp1 std1h

| SAMPLE      |                        | DEC. & VT |         |
|-------------|------------------------|-----------|---------|
| date        | Apr 7 97               | dfrq      | 300.178 |
| solvent     | CDC13                  | dn        | H1      |
| file        | /data/cfordc/~rc111173 | dpwr      | 30      |
| ACQUISITION |                        | dof       | 0       |
| sfrq        | 300.171                | dm        | nnn     |
| tn          | H1                     | dmm       | c       |
| at          | 1.999                  | dmf       | 200     |
| np          | 24000                  | dseq      |         |
| sw          | 6003.3                 | dres      | 1.0     |
| fb          | 3000                   | homo      | n       |
| PROCESSING  |                        | lb        | 0.10    |
| bs          | 16                     | wtfile    |         |
| tpwr        | 55                     | proc      | ft      |
| pw          | 17.0                   | fn        | 131072  |
| d1          | 1.500                  | math      | f       |
| tof         | 800.5                  |           |         |
| nt          | 16                     |           |         |
| ct          | 16                     | werr      |         |
| alock       | s                      | wexp      | wft     |
| gain        | not used               | wbs       |         |
| FLAGS       |                        | wnt       |         |
| il          | n                      |           |         |
| in          | n                      |           |         |
| dp          | y                      |           |         |
| hs          | nn                     |           |         |
| DISPLAY     |                        |           |         |
| sp          | -79.6                  |           |         |
| wp          | 2574.8                 |           |         |
| vs          | 163                    |           |         |
| sc          | 0                      |           |         |
| wc          | 210                    |           |         |
| hzmm        | 12.26                  |           |         |
| is          | 500.00                 |           |         |
| rfl         | 2773.5                 |           |         |
| rfp         | 2173.2                 |           |         |
| th          | 20                     |           |         |
| ins         | 100.000                |           |         |
| nm          | cdc ph                 |           |         |

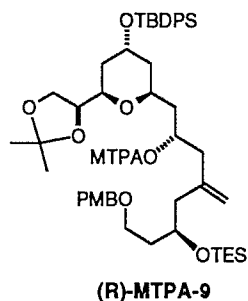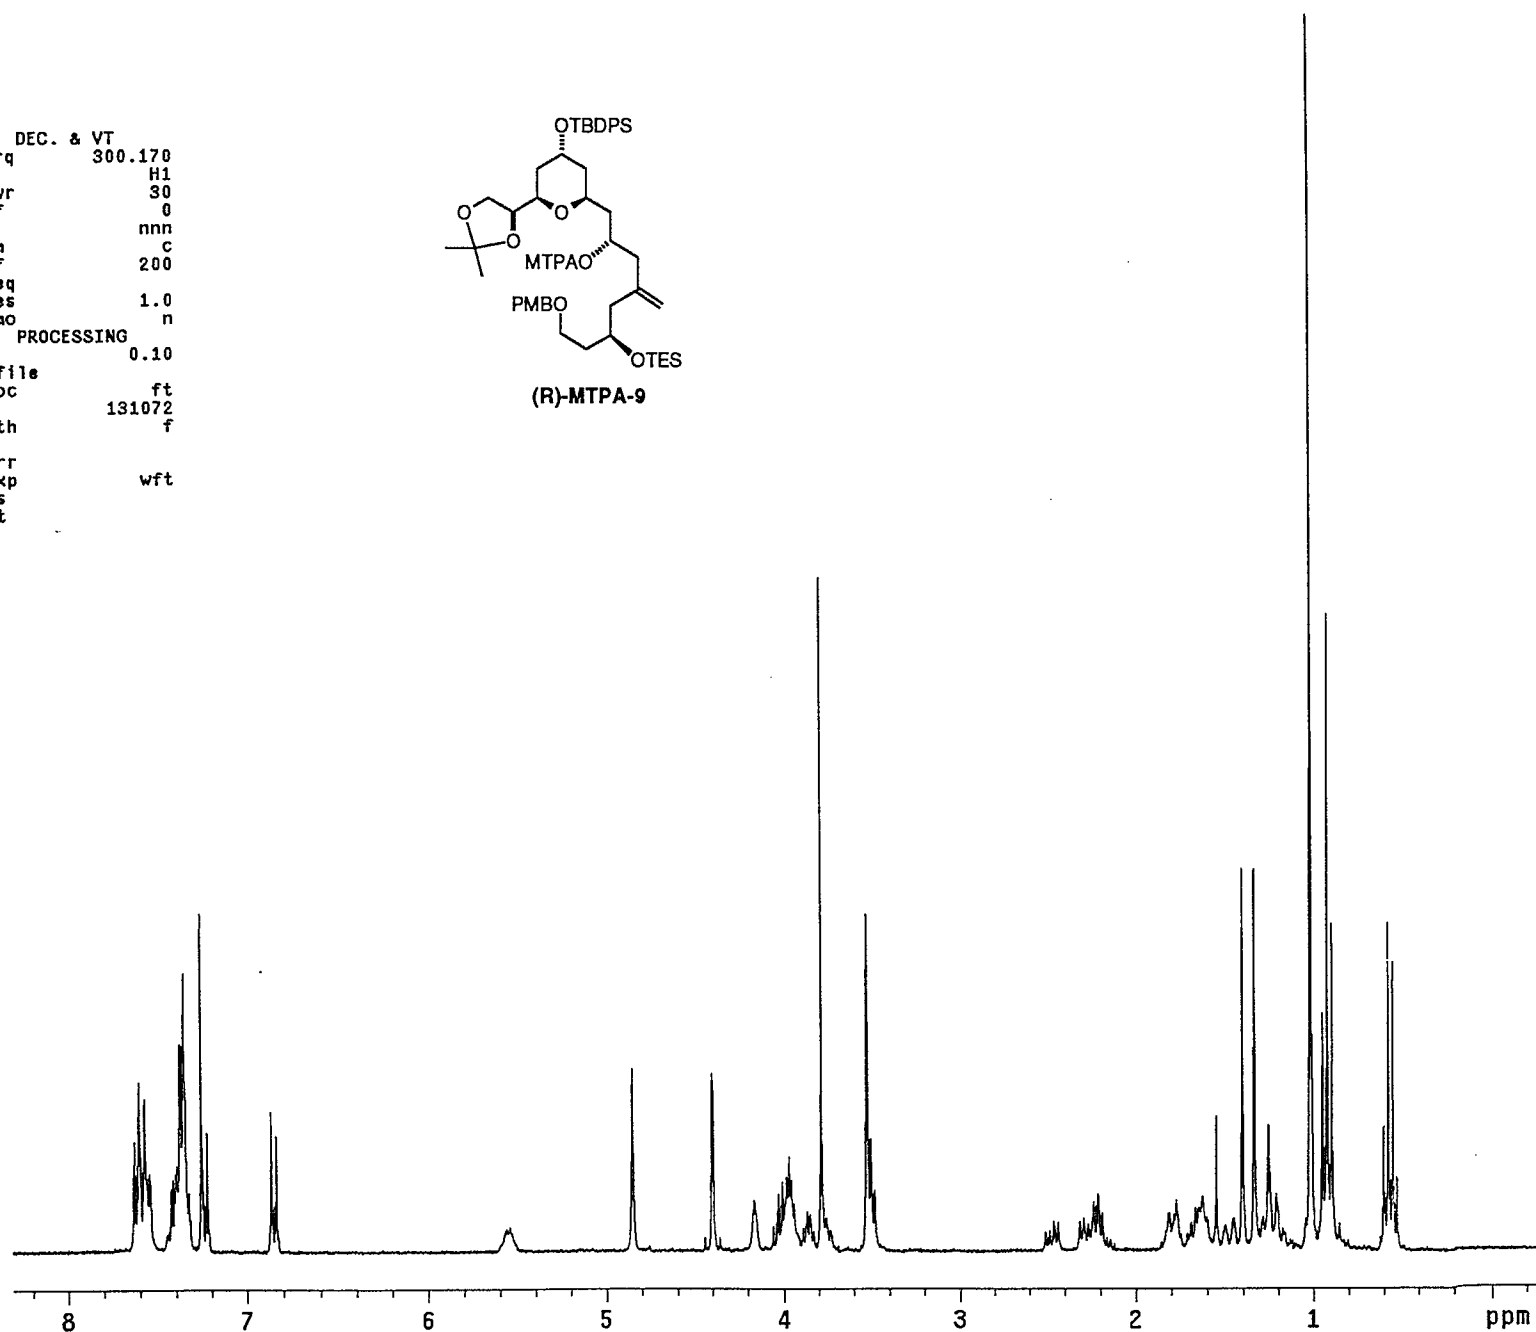

### STANDARD 1H OBSERVE

**exp1 std1h**

```

SAMPLE                                     DEC. & VT
date      Apr  7 87      dfreq      300.170
solvent      CDC13      dn      H1
file /data/cfordc/~      dpwr      30
      rciiii172      dof      0
ACQUISITION      dm      nnn
sfrq      300.171      dnm      c
tn      H1      dmf      200
at      1.999      dseq
np      24000      dres      1.0
sw      6003.3      homo      n
fb      3000
bs      1b      PROCESSING      0.10
tpwr      55      wfile
pw      17.0      proc      ft
d1      1.500      fn      131072
tof      900.5      math      f
nt      32
ct      32      werr
aLOCK      s      wexp      wft
gain      not used      wbs
      FLAGS      wnt
il      n
in      n
dp      y
hs      nn
DISPLAY
sp      -79.6
wp      2589.3
vs      160
sc      0
wc      210
hzmm      12.33
is      500.00
rfl      2773.5
rfp      2173.2
th      20
ins      100.000
nm      cdc ph

```

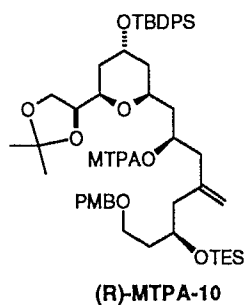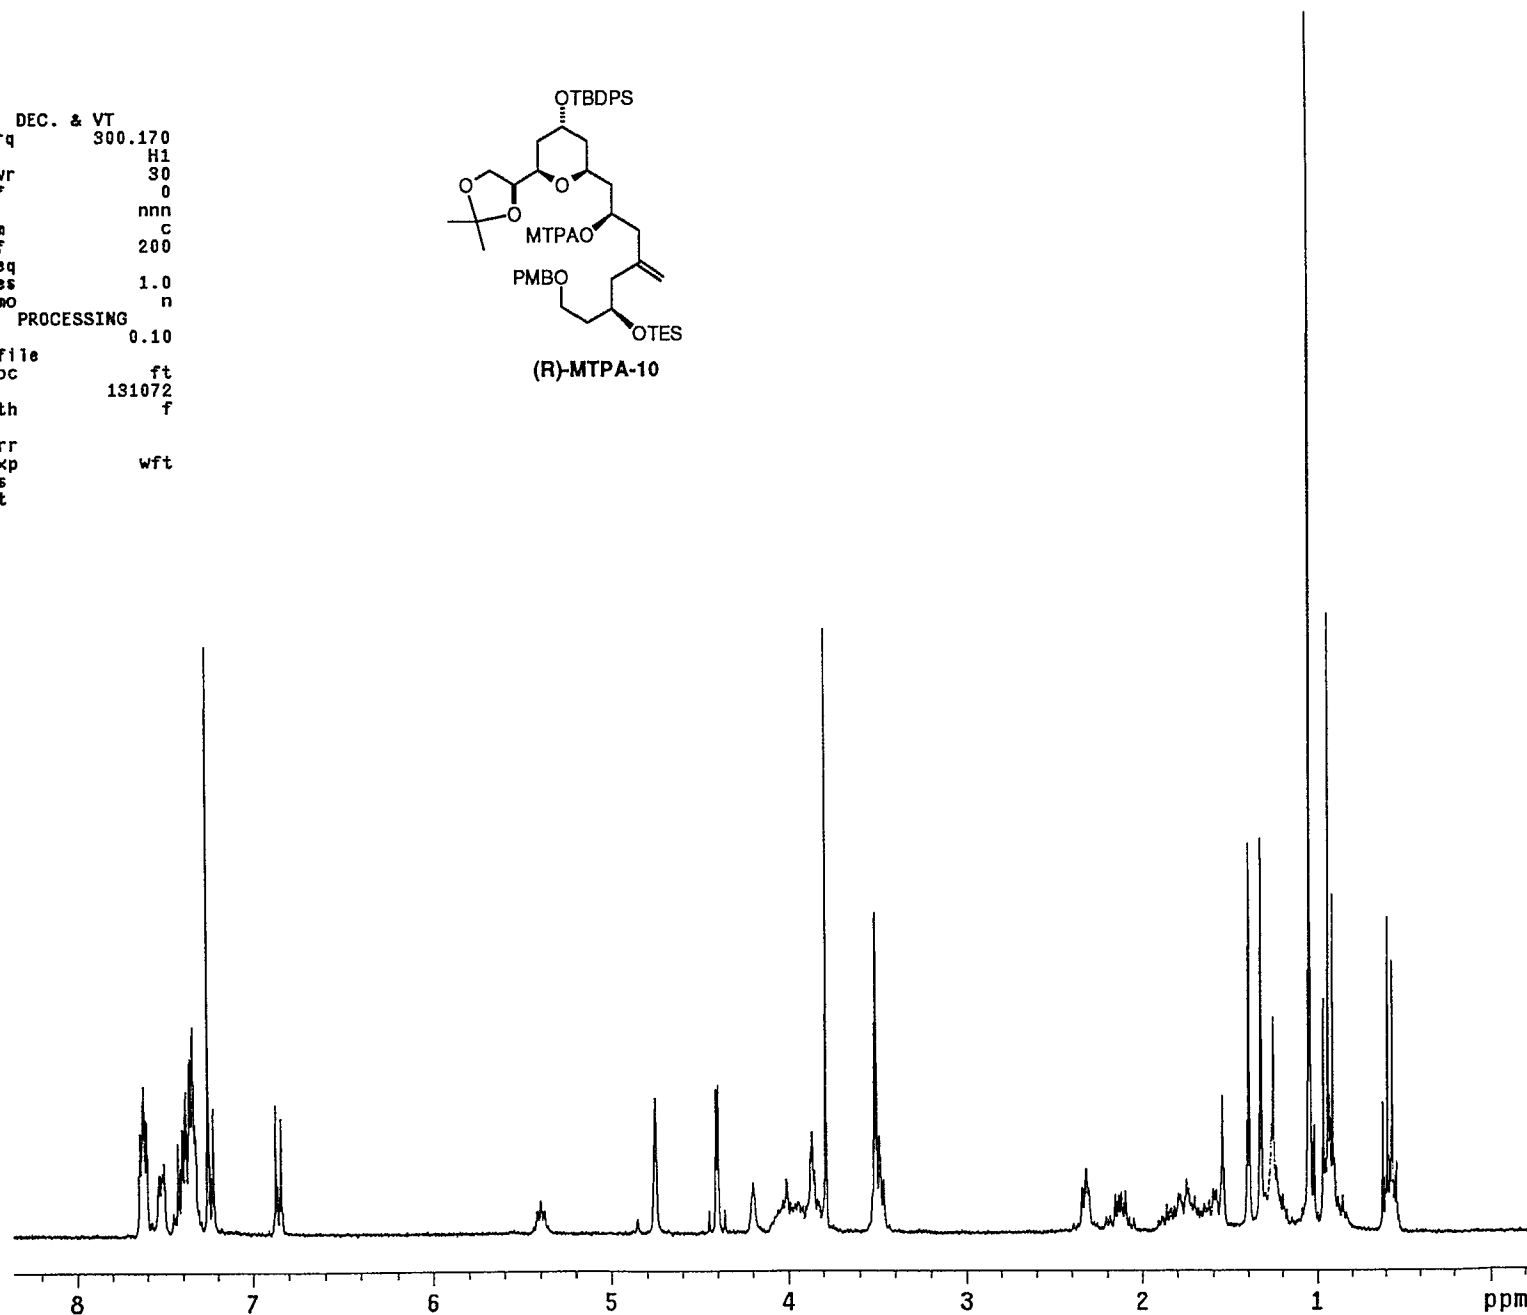

## STANDARD 1H OBSERVE

exp1 stdih

| SAMPLE      |                          | DEC. & VT  |         |
|-------------|--------------------------|------------|---------|
| date        | Apr 18 97                | dfrq       | 300.170 |
| solvent     | Benzene                  | dn         | H1      |
| file        | /data/cfordc/~rciii183_h | dpwr       | 30      |
|             |                          | dof        | 0       |
| ACQUISITION |                          | PROCESSING |         |
| sfrq        | 300.171                  | dmm        | nnn     |
| tn          | H1                       | dmf        | c       |
| at          | 1.999                    | dseq       | 200     |
| np          | 24000                    | dres       | 1.0     |
| sw          | 6003.3                   | homo       | n       |
| fb          | 3000                     |            |         |
| bs          | 16                       | lb         | 0.10    |
| tpwr        | 55                       | wtfile     |         |
| pw          | 17.0                     | proc       | ft      |
| d1          | 1.500                    | fn         | 131072  |
| tof         | 900.5                    | math       | f       |
| nt          | 32                       |            |         |
| ct          | 32                       | werr       |         |
| alock       | s                        | wexp       | wft     |
| gain        | not used                 | wbs        |         |
|             | FLAGS                    | wnt        |         |
| il          | n                        |            |         |
| in          | n                        |            |         |
| dp          | y                        |            |         |
| hs          | nn                       |            |         |
| DISPLAY     |                          |            |         |
| sp          | -67.2                    |            |         |
| wp          | 2576.7                   |            |         |
| vs          | 164                      |            |         |
| sc          | 0                        |            |         |
| wc          | 210                      |            |         |
| hzmm        | 12.27                    |            |         |
| is          | 500.00                   |            |         |
| rfl         | 2746.5                   |            |         |
| rfp         | 2146.2                   |            |         |
| th          | 20                       |            |         |
| ins         | 100.000                  |            |         |
| nm          | cdc ph                   |            |         |

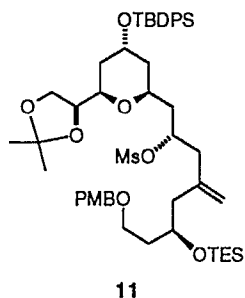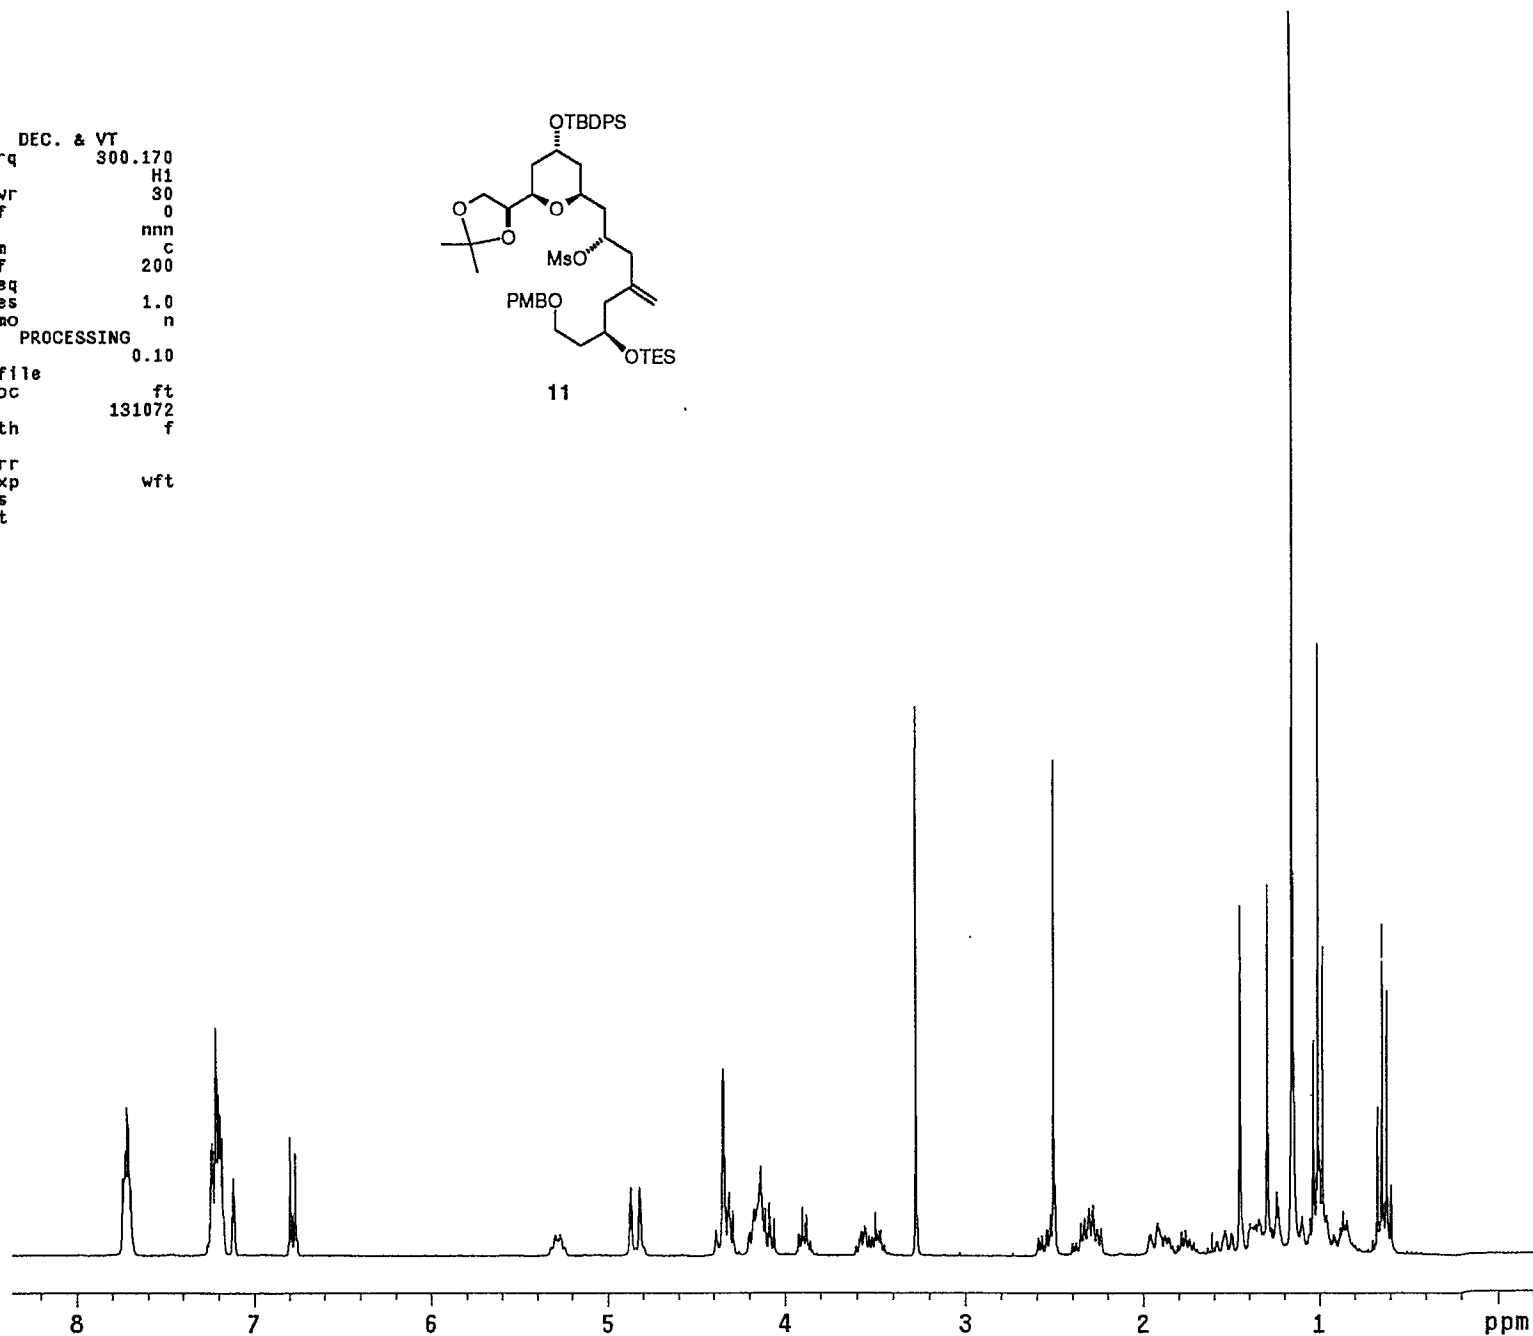

## STANDARD 1H OBSERVE

expi std1h

| SAMPLE      |                | DEC. & VT |         |
|-------------|----------------|-----------|---------|
| date        | Apr 21 97      | dfrq      | 300.170 |
| solvent     | Benzene        | dn        | H1      |
| file        | /data/cfordc/~ | dpwr      | 30      |
|             | rc111185_h     | dof       | 0       |
| ACQUISITION |                |           |         |
| sfrq        | 300.171        | dm        | nnn     |
| tn          | H1             | dmm       | c       |
| at          | 1.399          | dmf       | 200     |
| np          | 24000          | dseq      |         |
| sw          | 6003.3         | dres      | 1.0     |
| fb          | 3000           | homo      | n       |
| PROCESSING  |                |           |         |
| bs          | 16             | lb        | 0.10    |
| tpwr        | 55             | wtfile    |         |
| pw          | 17.0           | proc      | ft      |
| d1          | 1.500          | fn        | 131072  |
| tof         | 900.5          | math      | f       |
| nt          | 32             |           |         |
| ct          | 32             | werr      |         |
| alock       | s              | wexp      | wft     |
| gain        | not used       | wbs       |         |
|             | FLAGS          | wnt       |         |
| il          | n              |           |         |
| in          | n              |           |         |
| dp          | y              |           |         |
| hs          | nn             |           |         |
| DISPLAY     |                |           |         |
| sp          | -79.6          |           |         |
| wp          | 2589.3         |           |         |
| vs          | 162            |           |         |
| sc          | 0              |           |         |
| wc          | 210            |           |         |
| hzmm        | 12.33          |           |         |
| is          | 500.00         |           |         |
| rfl         | 2746.5         |           |         |
| rfp         | 2146.2         |           |         |
| th          | 20             |           |         |
| ins         | 100.000        |           |         |
| nm          | cdc ph         |           |         |

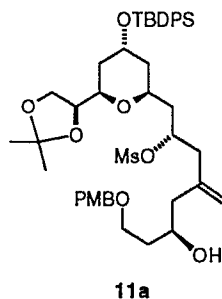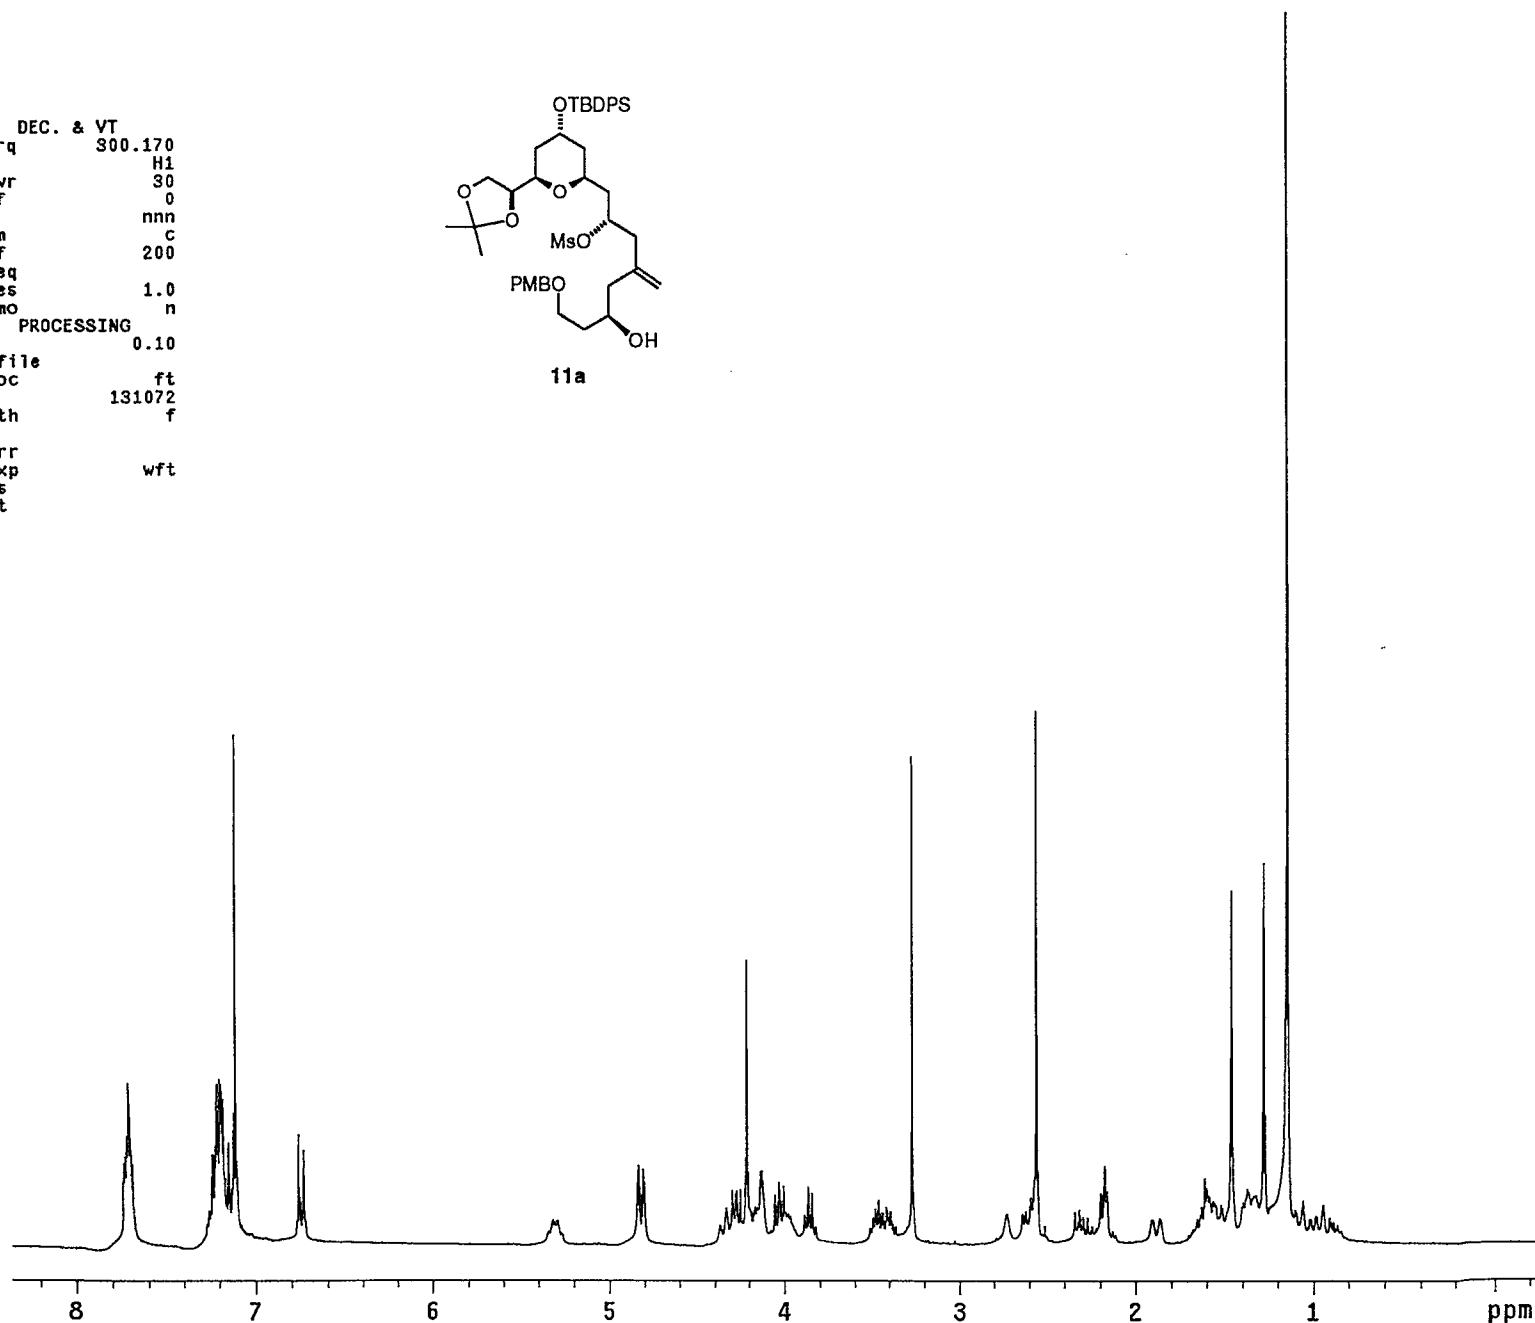

## STANDARD PROTON PARAMETERS

exp1 s2pu1

| SAMPLE      |                          | DEC. & VT  |         |
|-------------|--------------------------|------------|---------|
| date        | Apr 23 97                | dfrq       | 499.870 |
| solvent     | CDC13                    | dn         | H1      |
| file        | /data/cfordc/~rc111187_h | dpwr       | 15      |
|             |                          | dof        | 0       |
| ACQUISITION |                          | dm         | nnn     |
| sfrq        | 499.871                  | dmm        | c       |
| tn          | H1                       | dmf        | 200     |
| at          | 2.001                    | dseq       |         |
| np          | 40000                    | dres       | 1.0     |
| sw          | 9997.5                   | homo       | n       |
| fb          | 6000                     | PROCESSING |         |
| bs          | 16                       | lb         | 0.10    |
| tpwr        | 58                       | wtfile     |         |
| pw          | 7.5                      | proc       | ft      |
| di          | 1.500                    | fn         | 131072  |
| tof         | 1504.1                   | math       | f       |
| nt          | 32                       |            |         |
| ct          | 32                       | werr       |         |
| alock       | n                        | wexp       | wft     |
| gain        | not used                 | wbs        |         |
| FLAGS       |                          | wnt        | wft     |
| il          | n                        |            |         |
| in          | n                        |            |         |
| dp          | y                        |            |         |
| hs          | yn                       |            |         |
| DISPLAY     |                          |            |         |
| sp          | -104.1                   |            |         |
| wp          | 4264.0                   |            |         |
| vs          | 41                       |            |         |
| sc          | 0                        |            |         |
| wc          | 210                      |            |         |
| hzmm        | 20.30                    |            |         |
| is          | 33.57                    |            |         |
| rfl         | 4614.4                   |            |         |
| rfp         | 3619.1                   |            |         |
| th          | 7                        |            |         |
| ins         | 100.000                  |            |         |
| al          | cdc ph                   |            |         |

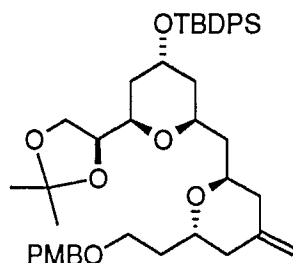

12

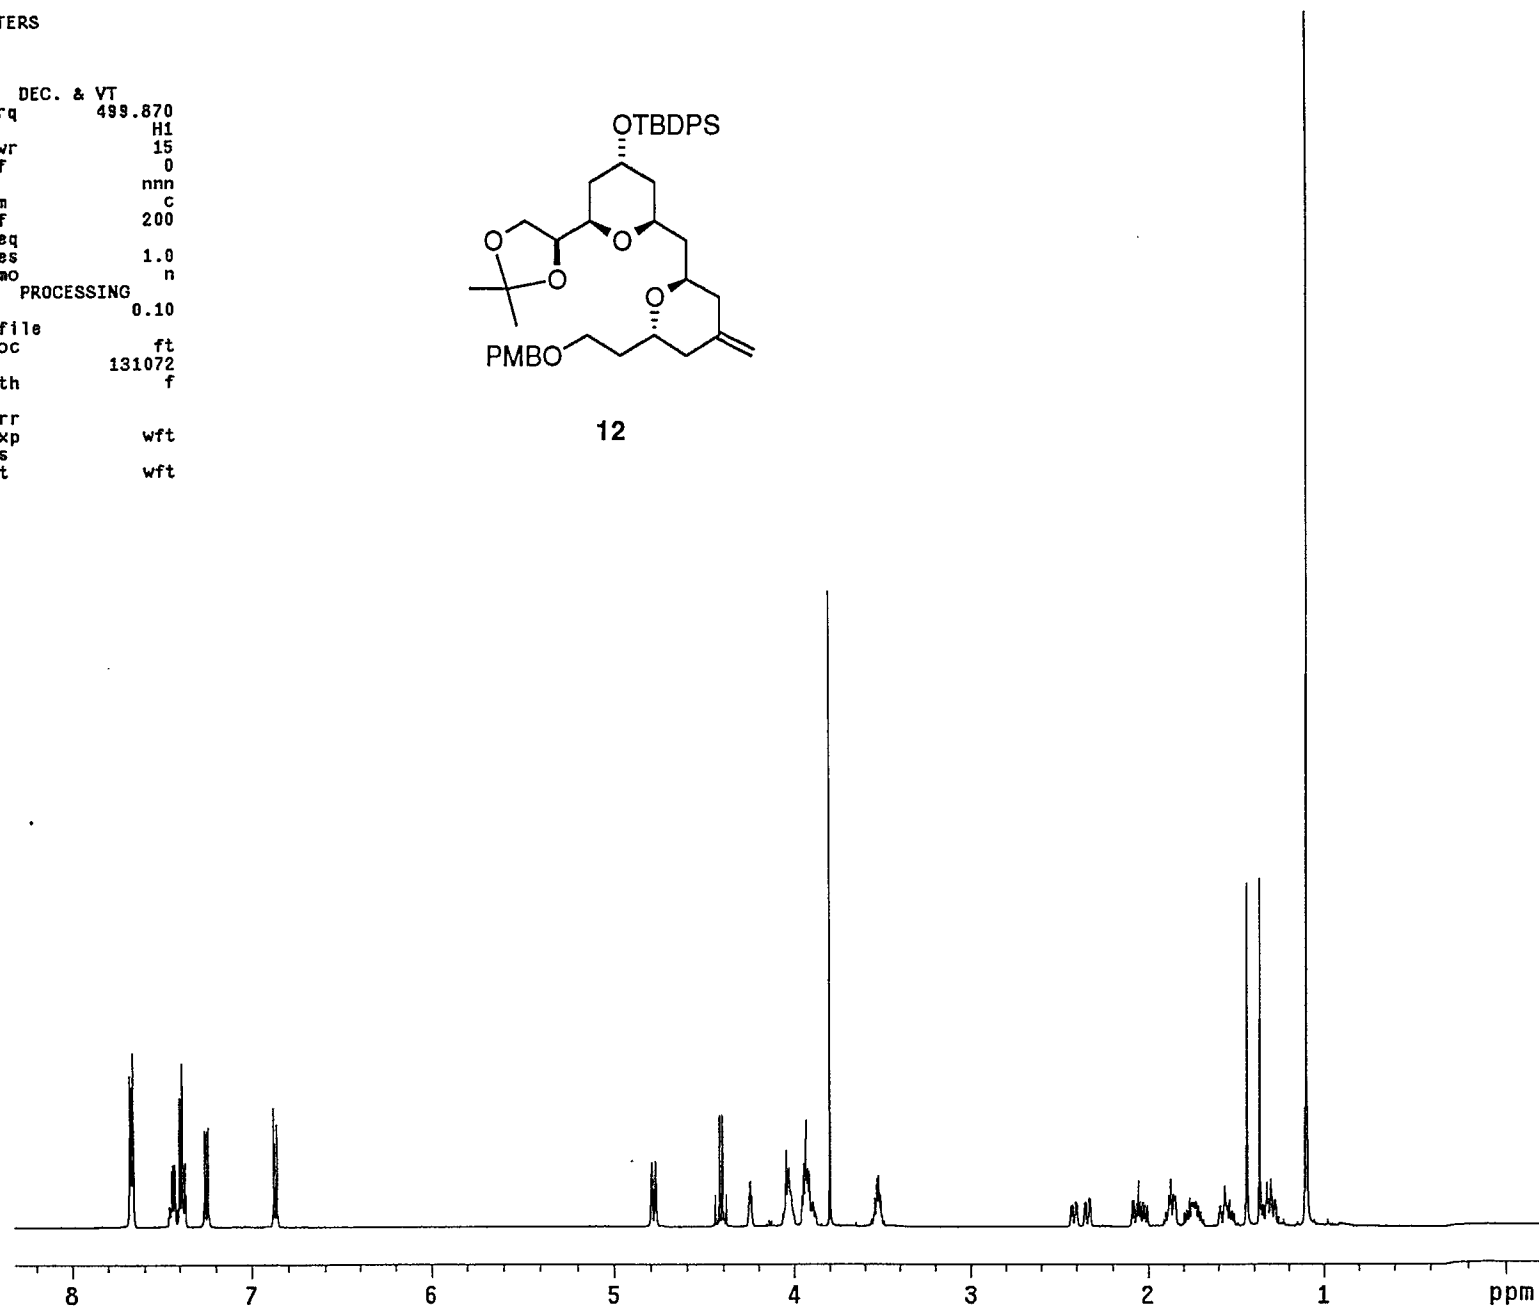

## STANDARD PROTON PARAMETERS

exp1 s2pu1

| SAMPLE      |                | DEC. & VT  |         |
|-------------|----------------|------------|---------|
| date        | Apr 25 97      | dfrq       | 499.870 |
| solvent     | CDC13          | dn         | H1      |
| file        | /data/cfordc/~ | dpwr       | 15      |
|             | rc111189_h     | dof        | 0       |
| ACQUISITION |                | PROCESSING |         |
| sfrq        | 499.871        | dm         | nnn     |
| tn          | H1             | dmm        | c       |
| at          | 2.001          | dmf        | 200     |
| np          | 40000          | dseq       |         |
| sw          | 9997.5         | dres       | 1.0     |
| fb          | 6000           | homo       | n       |
| bs          | 16             | lb         | 0.10    |
| tpwr        | 58             | wtfile     |         |
| pw          | 7.5            | proc       | ft      |
| d1          | 1.500          | fn         | 131072  |
| tof         | 1504.1         | math       | f       |
| nt          | 32             |            |         |
| ct          | 0              | werr       |         |
| alock       |                | n          | wft     |
| gain        | not used       | wbs        |         |
|             | FLAGS          | wnt        | wft     |
| il          | n              |            |         |
| in          | n              |            |         |
| dp          | y              |            |         |
| hs          | yn             |            |         |
| DISPLAY     |                |            |         |
| sp          | -80.0          |            |         |
| wp          | 4264.0         |            |         |
| vs          | 39             |            |         |
| sc          | 0              |            |         |
| wc          | 210            |            |         |
| hzmm        | 20.30          |            |         |
| is          | 33.57          |            |         |
| rfl         | 4614.4         |            |         |
| rfp         | 3619.1         |            |         |
| th          | 7              |            |         |
| ins         | 100.000        |            |         |
| ai          | cdc ph         |            |         |

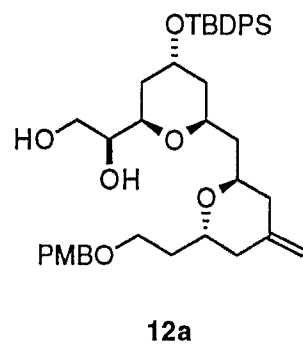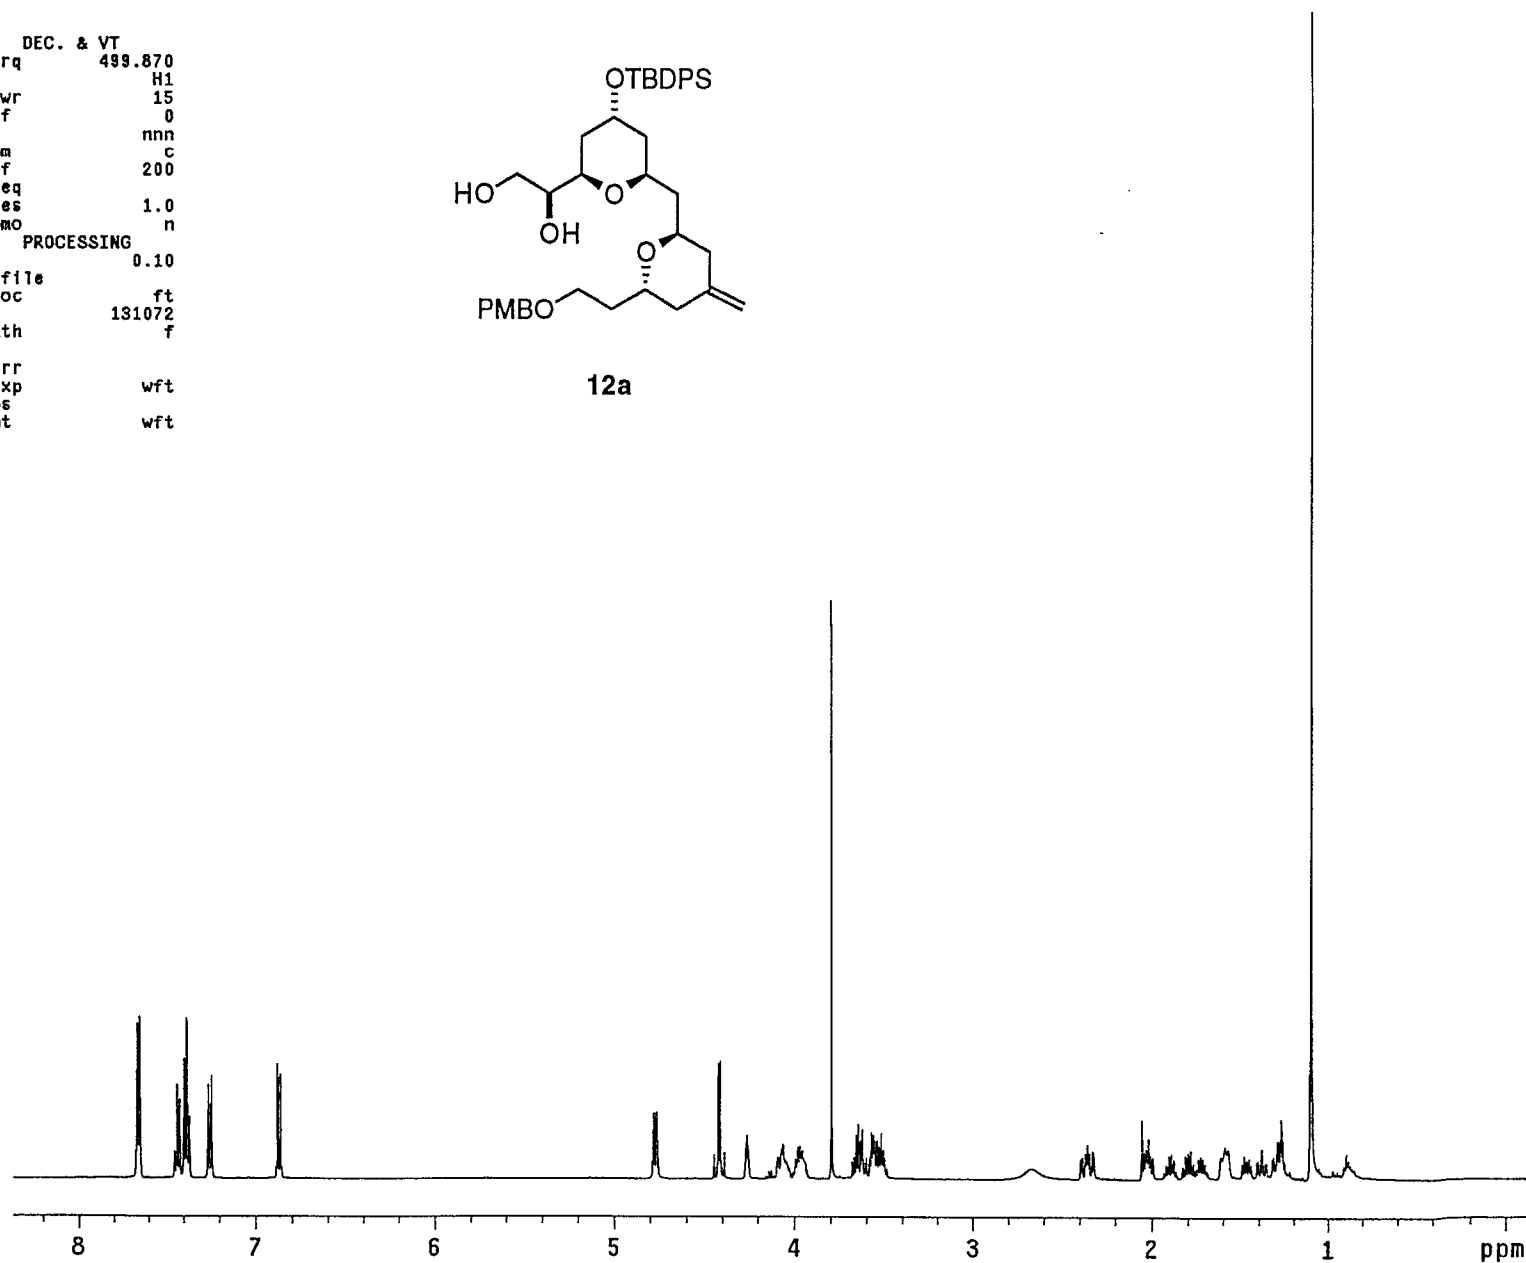

## STANDARD PROTON PARAMETERS

exp1 s2pu1

| SAMPLE      |                | DEC. & VT  |         |
|-------------|----------------|------------|---------|
| date        | Apr 28 97      | dfrq       | 499.870 |
| solvent     | CDC13          | dn         | H1      |
| file        | /data/cfordc/~ | dpwr       | 15      |
|             | rcii191_h      | dof        | 0       |
| ACQUISITION |                | dm         | nnn     |
| sfrq        | 499.871        | dmm        | c       |
| tn          | H1             | dmf        | 200     |
| at          | 2.001          | dseq       |         |
| np          | 40000          | dres       | 1.0     |
| sw          | 9997.5         | homo       | n       |
| fb          | 6000           | PROCESSING |         |
| bs          | 16             | lb         | 0.10    |
| tpwr        | 58             | wtfile     |         |
| pw          | 7.5            | proc       | ft      |
| d1          | 1.500          | fn         | 131072  |
| tof         | 1504.1         | math       | f       |
| nt          | 32             |            |         |
| ct          | 32             | werr       |         |
| alock       | n              | wexp       | wft     |
| gain        | not used       | wbs        |         |
| FLAGS       |                | wnt        | wft     |
| il          | n              |            |         |
| in          | n              |            |         |
| dp          | y              |            |         |
| hs          | yn             |            |         |
| DISPLAY     |                |            |         |
| sp          | -104.1         |            |         |
| wp          | 4287.9         |            |         |
| vs          | 39             |            |         |
| sc          | 0              |            |         |
| wc          | 210            |            |         |
| hzmm        | 20.42          |            |         |
| is          | 33.57          |            |         |
| rfl         | 4614.4         |            |         |
| rfp         | 3619.1         |            |         |
| th          | 7              |            |         |
| ins         | 100.000        |            |         |
| ai          | cdc ph         |            |         |

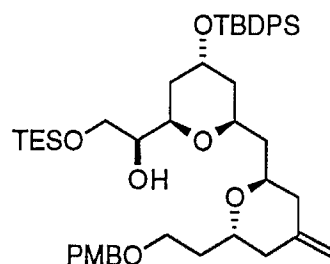

13

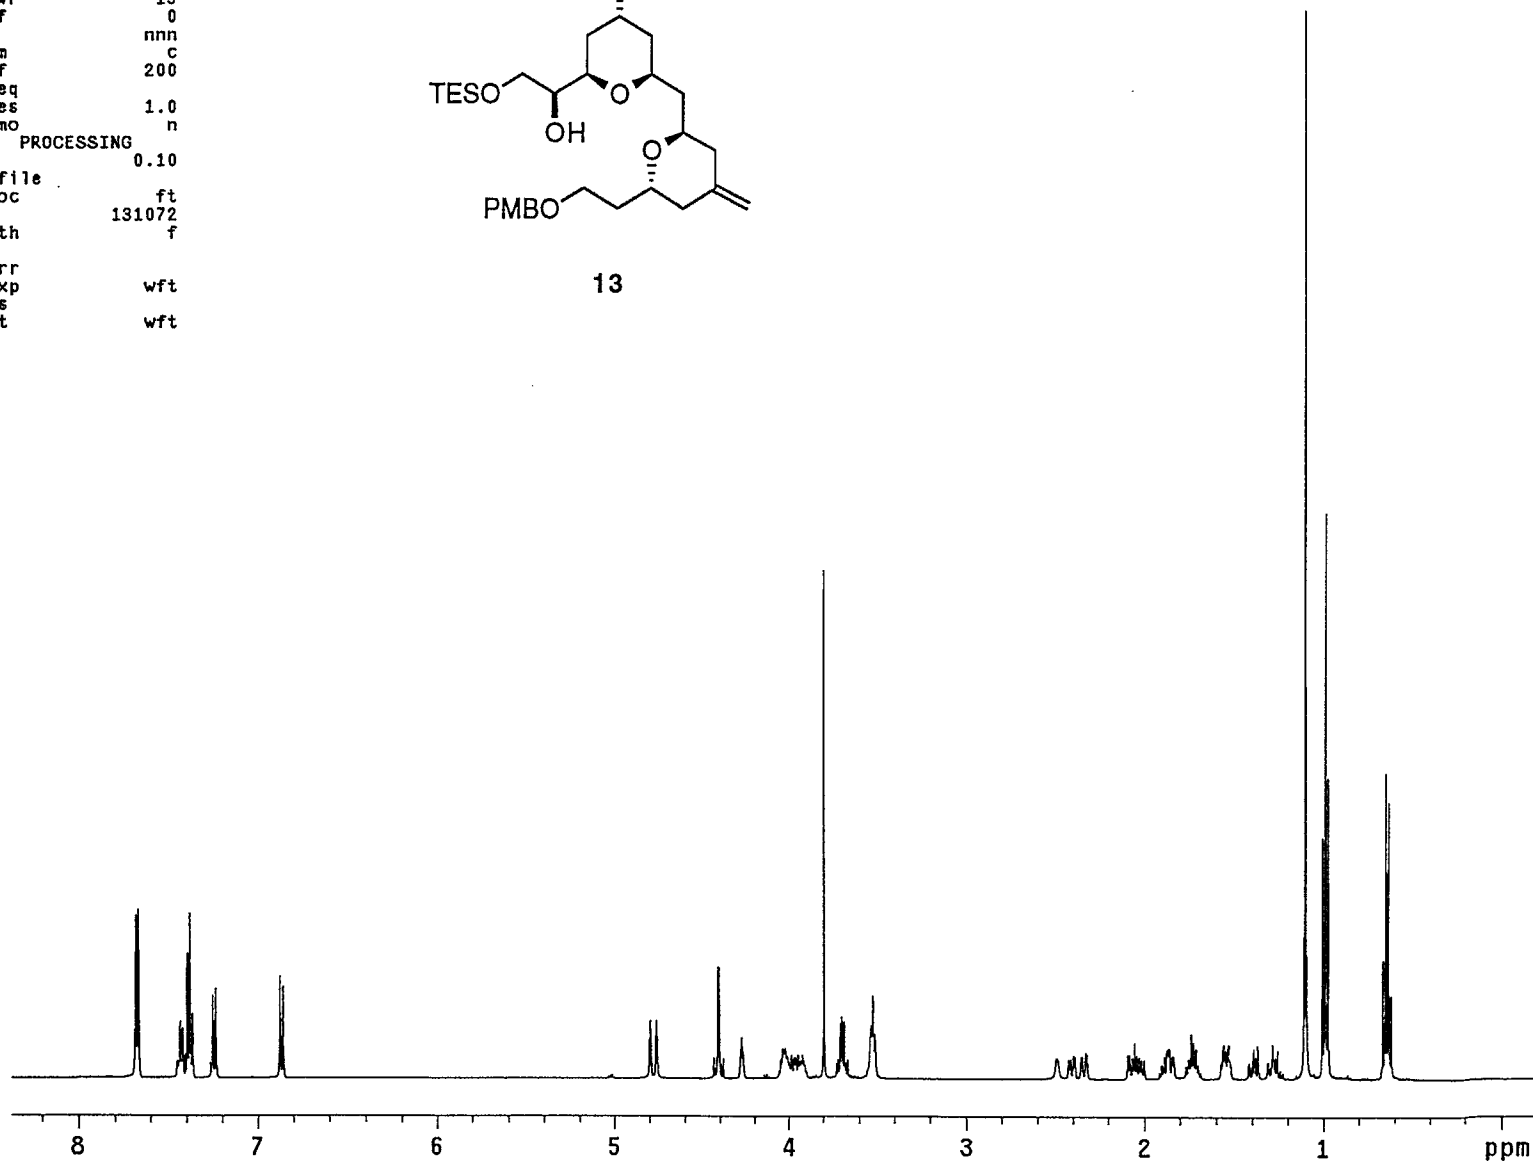

## STANDARD PROTON PARAMETERS

exp1 s2pu1

| SAMPLE      |                | DEC. & VT  |         |
|-------------|----------------|------------|---------|
| date        | Apr 29 97      | dfrq       | 499.870 |
| solvent     | CDC13          | dn         | H1      |
| file        | /data/cfordc/~ | dpwr       | 15      |
|             | rcii1193_h     | dof        | 0       |
| ACQUISITION |                | dm         | nnn     |
| sfrq        | 499.871        | dmm        | C       |
| tn          | H1             | dmf        | 200     |
| at          | 2.001          | dseq       |         |
| np          | 40000          | dres       | 1.0     |
| sw          | 9997.5         | homo       | n       |
| fb          | 6000           | PROCESSING |         |
| bs          | 16             | lb         | 0.10    |
| tpwr        | 58             | wtfile     |         |
| pw          | 7.5            | proc       | ft      |
| d1          | 1.500          | fn         | 131072  |
| tof         | 1504.1         | math       | f       |
| nt          | 32             |            |         |
| ct          | 32             | werr       |         |
| alock       | n              | wexp       | wft     |
| gain        | not used       | wbs        |         |
| FLAGS       |                | wnt        | wft     |
| il          | n              |            |         |
| in          | n              |            |         |
| dp          | y              |            |         |
| hs          | yn             |            |         |
| DISPLAY     |                |            |         |
| sp          | -80.0          |            |         |
| wp          | 4239.9         |            |         |
| vs          | 59             |            |         |
| sc          | 0              |            |         |
| wc          | 210            |            |         |
| hzmm        | 20.19          |            |         |
| is          | 33.57          |            |         |
| rfl         | 4614.4         |            |         |
| rfp         | 3619.1         |            |         |
| th          | 7              |            |         |
| ins         | 100.000        |            |         |
| ai          | cdc            | ph         |         |

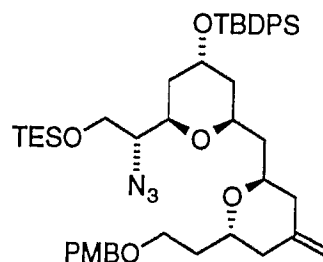

13a

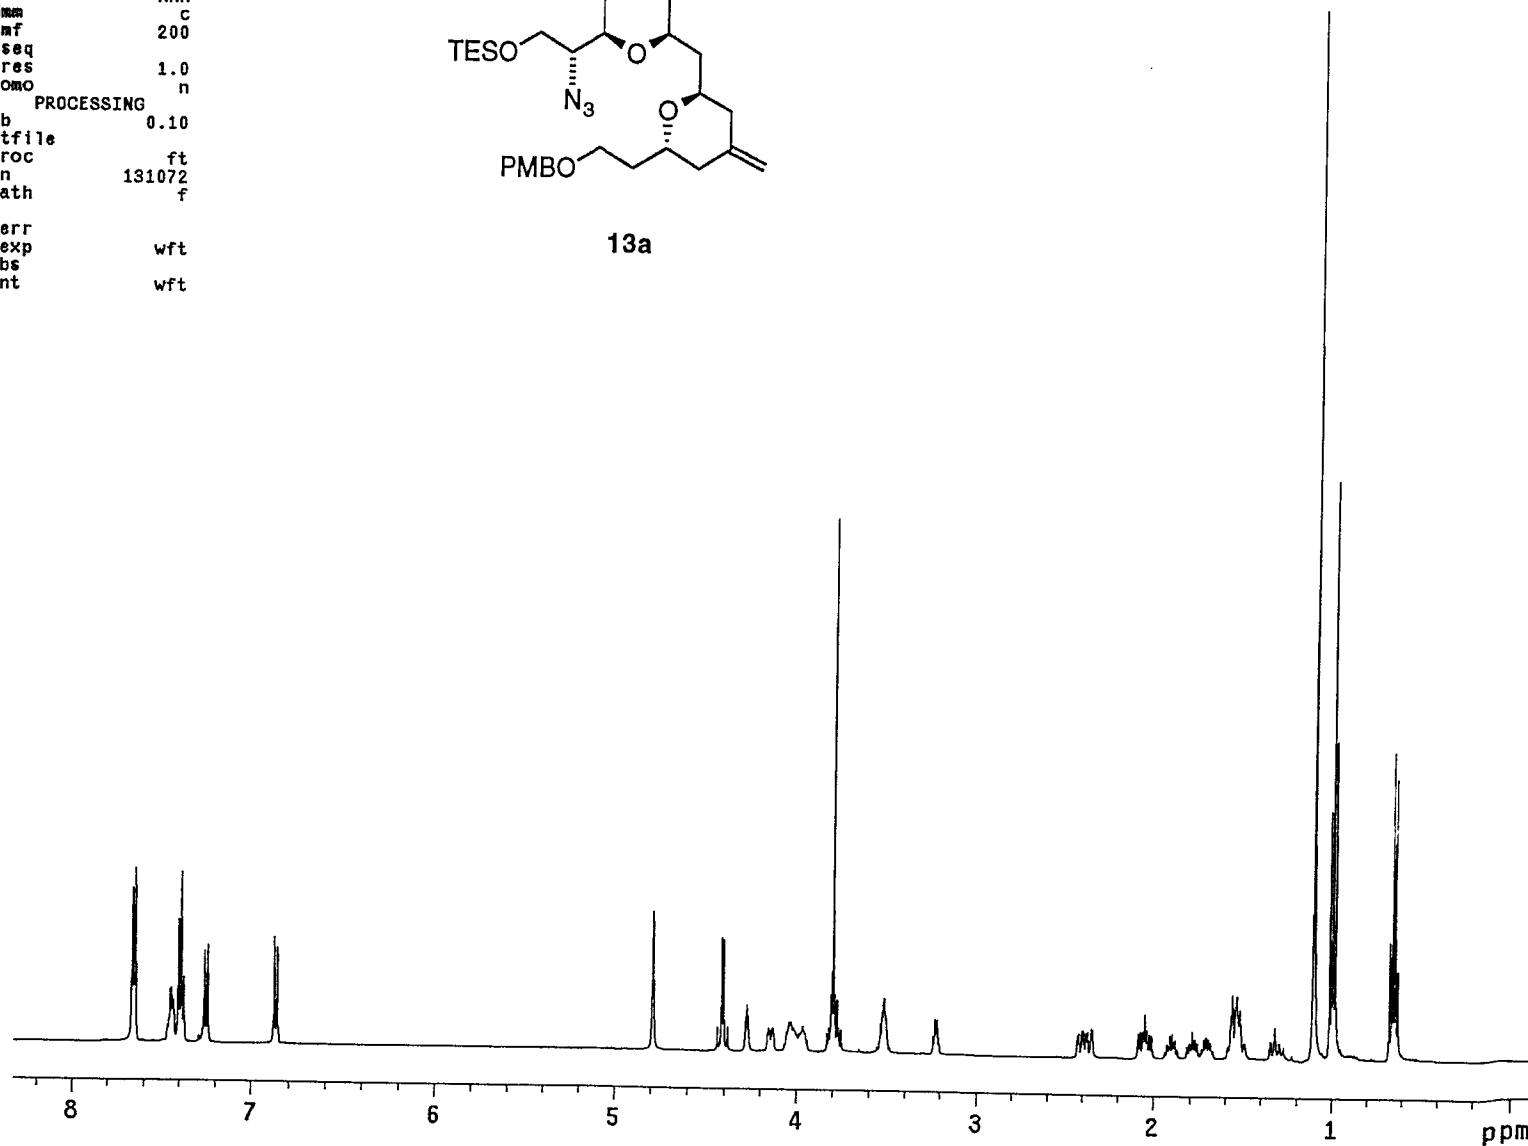



## STANDARD PROTON PARAMETERS

exp1 s2pu1

| SAMPLE      |                          | DEC. & VT |         |
|-------------|--------------------------|-----------|---------|
| date        | Apr 30 97                | dfrq      | 499.870 |
| solvent     | CDCl3                    | dn        | H1      |
| file        | /data/cfordc/~rciii194_h | dpwr      | 15      |
| ACQUISITION |                          | dof       | 0       |
| sfrq        | 499.871                  | dm        | nnn     |
| tn          | H1                       | dmm       | c       |
| at          | 2.001                    | dmf       | 200     |
| np          | 40000                    | dseq      |         |
| sw          | 9997.5                   | dres      | 1.0     |
| fb          | 6000                     | homo      | n       |
| PROCESSING  |                          |           |         |
| bs          | 16                       | lb        | 0.10    |
| tpwr        | 58                       | wtfile    |         |
| pw          | 7.5                      | proc      | ft      |
| d1          | 1.500                    | fn        | 131072  |
| tof         | 1504.1                   | math      | f       |
| nt          | 32                       |           |         |
| ct          | 32                       | werr      |         |
| alock       | n                        | wexp      | wft     |
| gain        | not used                 | wbs       |         |
| FLAGS       |                          | wnt       | wft     |
| il          | n                        |           |         |
| in          | n                        |           |         |
| dp          | y                        |           |         |
| hs          | yn                       |           |         |
| DISPLAY     |                          |           |         |
| sp          | -176.2                   |           |         |
| wp          | 4336.1                   |           |         |
| vs          | 51                       |           |         |
| sc          | 0                        |           |         |
| wc          | 210                      |           |         |
| hzmm        | 20.65                    |           |         |
| is          | 33.57                    |           |         |
| rfl         | 4614.4                   |           |         |
| rfp         | 3619.1                   |           |         |
| th          | 7                        |           |         |
| ins         | 100.000                  |           |         |
| ai          | cdc ph                   |           |         |

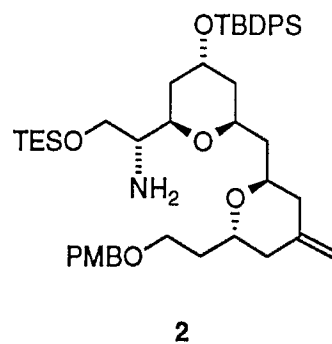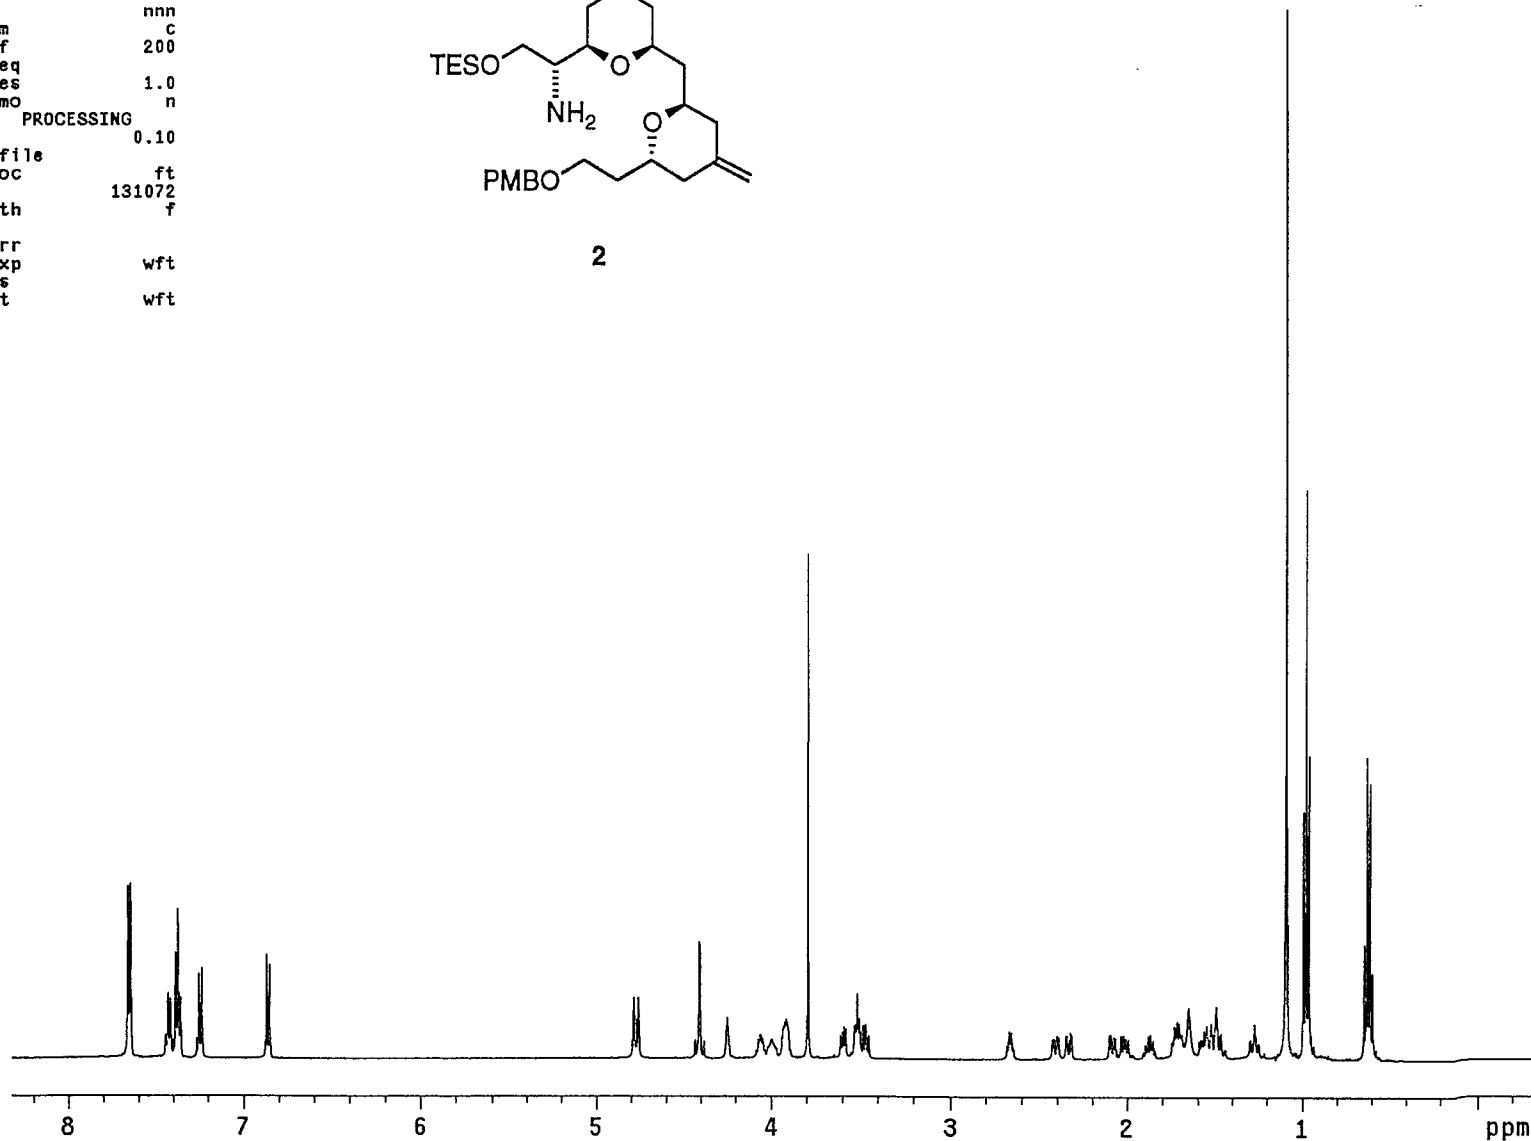

Supplement: Supplementary file 1 [file 5797578]
